# 1 [Research Article]

## 2 **Macrophages break interneuromast cell quiescence by** 3 **intervening the inhibition of Schwann cells in zebrafish lateral** 4 **line**

5

6 Meng-Ju Lin<sup>1,†</sup>, Chia-Ming Lee<sup>2</sup>, Wei-Lin Hsu<sup>1</sup>, Bi-Chang Chen<sup>2</sup>, and

7 Shyh-Jye Lee<sup>1,3,4\*</sup>

8

9 <sup>1</sup>Department of Life Science, National Taiwan University, 1 Roosevelt Rd., Sec., 4,

10 Taipei 10617, Taiwan, R.O.C.

11 <sup>2</sup>Research Center for Applied Sciences, Academia Sinica, 128 Academia Road, Section 2,

12 Nankang, Taipei 11529, Taiwan, R.O.C.

13 <sup>3</sup>Research Center for Developmental Biology and Regenerative Medicine, National

14 Taiwan University, 1 Roosevelt Rd., Sec., 4, Taipei 10617, Taiwan, R.O.C.

15 <sup>4</sup>Center for Biotechnology, National Taiwan University, 1 Roosevelt Rd., Sec., 4, Taipei

16 10617, Taiwan, R.O.C.

17

18 \* Author for correspondence ([jefflee@ntu.edu.tw](mailto:jefflee@ntu.edu.tw))

19 <sup>†</sup>Present address: Department of Plastic Surgery, New York University, 540 First

20 Avenue, Skirball Institute, New York, NY 10016, USA.

21

# 1    **ABSTRACT**

2    In the zebrafish lateral line system, interneuromast cells (INCs) between neuromasts are  
3    normally kept quiescent by underlying Schwann cells (SWCs). Upon severe injuries that  
4    cause the complete loss of an entire NM, INCs can occasionally differentiate into NMs  
5    but how they escape from the inhibition by SWCs is still unclear. Using a  
6    genetic/chemical method to specifically ablate a neuromast, we found a small portion of  
7    larvae can regenerate a new neuromast, but the regeneration was hindered by inhibiting  
8    macrophages. We also demonstrated that the inhibition of macrophage can reduce the  
9    percentage of tail fin-amputated larvae to regenerate a new NM. By *in toto* imaging, we  
10   further discovered heterogeneities in macrophage behavior and distribution along lateral  
11   line. We witnessed the crawling of macrophages in between injured lateral line and  
12   SWCs during regeneration and also in between the second primordium and the first  
13   mature lateral line during development. It implies that macrophages may physically  
14   separate and alleviate the inhibition from pLLn and SWCs to break the quiescence of  
15   INCs during regeneration and development in the zebrafish lateral line.

16

17   Keywords: regeneration, lateral line, interneuromast cell, Schwann cell, Wnt,  
18   macrophage

# 1 INTRODUCTION

2 Tissue regeneration is as critical step to maintain homeostasis and restore organ function  
 3 after injury in multicellular organisms. Planarians form neoblasts to replenish the whole  
 4 organism from finite body parts [1, 2]. In contrast, injury results in massive scarring that  
 5 hampers regeneration in mammals, so mammals only retain a limited regeneration  
 6 capacity to replace their damaged tissues. Scars often cause irreversible cell loss and  
 7 damages to tissues and organs. For example, the destruction of mechanosensory hair cells  
 8 within inner ear by antibiotics, noise or aging may cause hearing deficit. However, in  
 9 lower vertebrates like birds, amphibians and fish, hair cells could be robustly and  
 10 continuously recovered after damage [3-7]. Intriguingly, multipotent progenitor cells  
 11 residing in mammalian cochlea could be cultured *in vitro* under some conditions that  
 12 potentially could be used to complement hair cell loss [8-11]. It suggests that genetic  
 13 machinery for tissue renewal is still retained in most animal species but not the regulatory  
 14 mechanisms required to awaken the quiescence of stem cells [12, 13]. However,  
 15 outstanding questions still remain elusive. For examples. how the regeneration is  
 16 triggered? How the responsiveness of progenitor cells is regulated at the cellular and  
 17 molecular levels and how the degree of triggers may result and/or regulate differential  
 18 responsiveness of potential progenitor cells. To investigate these questions, we study  
 19 zebrafish (*Danio rerio*), a well-established vertebrate model with remarkable  
 20 regeneration capacity in most tissues and organs, including lateral line system.

21

22 The lateral line system is a mechanosensory system that detects water movements  
 23 around fish body, contributing to navigation, schooling and predator avoidance [14, 15].

1 The zebrafish lateral line system includes anterior and posterior lateral lines flanking both  
2 lateral sides of fish body. The sensory organs of the lateral line system are neuromasts.  
3 Taking the posterior lateral line (pLL) as an example, neuromasts are periodically  
4 deposited during the posterior migration of a pLL primordium (pLLp), which is a  
5 migrating cluster of about a hundred cells [16]. A neuromast is composed of centrally-  
6 positioned hair cells, which are functionally and structurally similar to the hair cells of  
7 mammalian inner ear. Hair cells are protected by surrounded supporting cells or mantle  
8 cells, which are progenitor cells during hair regeneration (Fig. 1A) [17, 18]. The lateral  
9 line hair cells are exposed on the body surface and constantly face mechanical and/or  
10 chemical environmental assaults. Due to the superficial location, hair cells can be easily  
11 ablated in zebrafish by exposing zebrafish larvae to heavy ions like copper [7, 19, 20],  
12 mercury [21] or antibiotics such as neomycin [22]. A previous study reported that  
13 supporting cells underneath hair cells are notable progenitor cells in contrast to the center  
14 or anterior differentiating or dormant support cells [6]. In addition, mantle cells encircling  
15 the neuromast are quiescent cells, however, they can re-enter the S phase to form a new  
16 neuromast facing a high copper ion concentration [6] and a severe injury like tail-fin  
17 amputation [23, 24]. Lastly, interneuromast cells (INCs) sitting in between neuromasts  
18 are also kept quiescent by the underlying Schwann cells (SWCs) and pLL nerve (pLLn)  
19 connecting to hair cells. Perturbation of epidermal growth factor (EGF) pathway between  
20 SWCs and pLLn results in early activation of INCs and precocious intercalary neuromast  
21 formation [25-28]. The intercalary neuromast formation also occurs during the migration  
22 of the 2<sup>nd</sup> pLLp by intervening the contact between INCs and SWCs [18, 29, 30]. It has  
23 also been shown that a new neuromast can be regenerated by electro-ablating a whole



1 neuromast [31]. These studies nicely demonstrate the regeneration capacity of INCs. By  
2 RNA-seq analysis and functional assay, mantle cells and INCs have been shown to  
3 contribute to hair cell regeneration by interrogating multiple signaling pathways such as  
4 Notch, Wnts, Fgfs and retinoic acid (RA) sequentially and spatially [32, 33]. However, it  
5 is still puzzling to understand the cellular hierarchy of lateral line regeneration while  
6 facing diversified external cues.

7  
8 Tissue damage elicited macrophage infiltration has recently been demonstrated to be  
9 one of factors promoting regeneration [34, 35]. Macrophages acquire polarity transition  
10 from the M1-like macrophages, which are classically regarded as activated pro-  
11 inflammatory cells, to the M2-like phenotype known as alternative activated  
12 macrophages involved in inflammation resolution [36, 37]. To suppress the chronic  
13 inflammatory response, macrophages clean up infected neutrophils by phagocytosis [38]  
14 and secrete anti-inflammatory cytokines such as IL-10 and TGF $\beta$  [39, 40]. Recently,  
15 macrophages were found to enhance regeneration by secreting cytokines. Macrophage-  
16 secreted TNF $\alpha$  was demonstrated to be critical for blastema formation during fin  
17 regeneration in zebrafish [41]. Angiogenesis induced by the secretion of VEGF from  
18 macrophages could also assist in wound repair and regeneration of blood vessels and  
19 peripheral nerves [42-44]. Macrophages could also go through either canonical or non-  
20 canonical Wnt pathway to influence regeneration [45, 46]. In addition to the effects of  
21 cytokine, macrophages could exert mechanical forces to facilitate wound repair and  
22 regeneration [42, 47]. As expected, macrophages play a pivotal role in hair cell

1 regeneration in contrast to neutrophils [48]. However, how macrophages work to  
2 facilitate lateral line regeneration upon tissue damage remains unclear.

3

4 In this work, we first provide further evidences to support that INCs are the major  
5 progenitor cell source to replenish an entire neuromast post tail fin amputation. To our  
6 surprise, a few larvae were still found to regenerate a neuromast post specific chemical-  
7 genetic ablation without harming SWCs and pLLn. By *in toto* imaging, we show here  
8 macrophages were significantly patrolling at damage sites. In addition, we also observed  
9 that macrophages squeezed in between INCs and SWCs/pLLn. It suggests that  
10 macrophages break INC quiescence by intervening the inhibition of SWCs in zebrafish  
11 lateral line system.

12

13 Abbreviations: Interneumast cells (INCs), supporting cells (SCs), hair cells (HCs), mantle  
14 cells (MCs), Schwann cells (SWCs), days post fertilization (dpf), days post amputation  
15 (dpa)

16

# 1 MATERIALS AND METHODS

## 2 Ethics Statement

3 All animal handling procedures were approved by the use of laboratory animal committee  
4 at National Taiwan University, Taipei, Taiwan (IACUC Approval ID: 107 Animal Use  
5 document No. 00180) and were carried out in accordance with approved guidelines.

6

## 7 Zebrafish strains

8 Wild type AB zebrafish (*Danio rerio*), *Tg(-4.7alpl:mCherry)* [32], *Tg(-8.0cldnb:lyn-*  
9 *GFP)* [49], *Tg(FoxD3:GFP)* [50], *Tg(mpeg1:mCherry)* [51], *Tg(mpx:GFP)* [52] and  
10 *Tg(6XTcf/LefBS-miniP:d2GFP)<sup>isio1</sup>* [53] fish were maintained at 28.5°C on a 14-h  
11 light/10-h dark cycle. To generate the *Et(HG7L)* line, a transgenic cassette was generated  
12 by combining p5E-*hsp70*, pME-EGFP and p3E-polyA into pDestTol2CG2 via Gateway  
13 recombination cloning [54]. This *hsp70*-EGFP vector (HG) was proved to be suitable for  
14 enhancer trap screen (Fig. S1A) [55]. Therefore, we conducted an enhancer trap line  
15 screen and identified a trap line, *Et(HG7L)*, which was named after its specific expression  
16 in the pLL system (Fig. S1G-M), and was utilized in this study. To generate the *Tg(-*  
17 *8.0cldnb:NTR-hKikGR; myl7:egfp)* line, we generated a cassette for transgenesis by  
18 combining p5E-*8.0cldnb* (a kind gift from Dr. Tatjana Piotrowski) [6], pME-NTR-  
19 *hKikGR* (a kind gift from Dr. Chung-Der Hsiao) [56] and p3E-polyA into pDestTol2CG2  
20 through Gateway cloning. For transgenesis, both Tol2 transposon and Tol2 transposase  
21 mRNA were injected at 25 pg into 1-2 cell stage embryos and raised to adults (F0). We  
22 backcrossed F0 founder fish with wildtype fish, screened F1 embryos with strong EGFP  
23 signals in heart and selected one founder with a strong expression in the pLL system as

1 shown in Fig. S3. We also generated double transgenic lines, including *Tg(-*  
2 *8.0cldnb:NTR-hKikGR); Et(HG7L), Tg(mpeg1:mCherry; FoxD3:GFP),*  
3 *Tg(mpeg1:mCherry; -8.0cldnb:NTR-hKikGR), Tg(-4.7alpl:mCherry; 6XTcf/LefBS-*  
4 *miniP:d2GFP) and Tg(mpeg1:mCherry; mpx:GFP),* to be used for producing quadruple  
5 transgenic larvae as indicated. Embryos collected from natural mating were cultured and  
6 staged according to Kimmel et al [57].

## 7 **Whole mount *in situ* hybridization**

9 DNA fragments of *sorcs3* and *ccdc147* was cloned from zebrafish cDNAs by RT-PCR  
10 and subcloned into pGEMT-easy vectors for antisense probe synthesis. Primer pairs used  
11 are as following: *sorcs3* (forward: GTCGCCAATGCAAGTGAATTACGC; reverse:  
12 TTTCCAGACCAGTACACGACTGCGT) and *ccdc147* (forward:  
13 GACGACAGTACGTTGGAAACCATGG; reverse:  
14 CGGTGGCTTTAGTAAGGTTTTCCCG). Whole-mount *in situ* hybridization (WISH)  
15 was performed as described using digoxigenin (DIG)-labeled antisense RNA probe [58].  
16 Stained embryos were mounted in glycerol, observed under a Leica S8AP0  
17 stereomicroscope (Leica Microsystems, Wetzlar, Germany) and photographed using a  
18 Canon 7D DSLR camera (Canon, Tokyo, Japan).

## 19 **Immunohistochemistry and confocal microscopy**

21 Whole-mount immunohistochemistry (IHC) staining was performed as previously  
22 described [59] by using either mouse anti-GFP antibody (GT859, GeneTex, 1:500), rabbit  
23 anti-histone H3S10ph (phosphor Ser10) antibody (GTX128116, GeneTex, 1:1000),

1 mouse anti-ZO-1/TJP1 antibody (33-9100, Thermo Scientific, 1:100), rabbit anti-GFP  
2 antibody (GTX113617, GeneTex, 1:500), mouse anti-tubulin (acetyl Lys40) antibody  
3 (32-2700, Thermo Scientific, 1:1000) and rat anti-mCherry antibody (M11217, Molecular  
4 probes, Thermo Scientific, 1:300). Secondary antibodies used are as following: goat anti-  
5 mouse or anti-rabbit IgG conjugated with Alexa Flour 488 or Alexa Fluor 568 (Molecular  
6 probes, 1:500). Confocal images were collected utilizing LSM 780 or LSM 880 confocal  
7 laser-scanning microscope with 20X lens or 43X water lens (Carl Zeiss, Oberkochen,  
8 Germany). In general, 8 to 20 layers with 1  $\mu$ m thickness were scanned and stacked for  
9 each image unless otherwise stated, further processed and presented as maximum  
10 intensity projection by the Fiji software [60].

11

## 12 **Cell proliferation analysis and TUNEL staining**

13 To detect proliferating cells, embryos were first treated with 10 mM 5-bromo-2'-  
14 deoxyuridine (BrdU, Sigma-Aldrich) pulses at designated stage and then fixed with fresh  
15 4 % paraformaldehyde (PFA) in phosphate-buffered saline (PBS). IHC was performed  
16 with mouse BrdU antibody (B2531, Sigma-Aldrich, 1:250). Apoptotic cells were also  
17 examined by TUNEL assay. Embryos were fixed with 4% PFA/PBS overnight at 4°C  
18 and dehydrated with methanol at -20°C. After gradual rehydration, the embryos were  
19 permeabilized with 10  $\mu$ g/ml proteinase K for 2 min at room temperature then post-fixed  
20 by 4% PFA/PBS. After several washes of PBS-T (0.1% tween-20 in PBS), embryos were  
21 again fixed by pre-chilled solution containing ethanol and acetic acid (in 2:1 ratio) at  
22 -20°C for 10 min. After the pH value was brought back with washes of PBS-T, samples  
23 were incubated with 27  $\mu$ l labeling solution plus 3  $\mu$ l enzyme solution (In Situ Cell Death

1 Detection Kit, AP, Roche) at 37°C overnight. They were washed three times with PBS-T  
2 for 5 min each and were further performed with double IHC staining with mouse anti-  
3 tubulin (acetyl Lys40) antibody and rabbit anti-GFP antibody.

4

#### 5 **Time-lapse movies with light sheet fluorescence microscope (LSFM)**

6 The time lapse movies revealing the morphogenesis of neuromast regeneration were  
7 taken by the Zeiss Lightsheet Z. 1 (Carl Zeiss, Oberkochen, Germany). The other  
8 recordings showing macrophages dynamics were taken by a simple light sheet platform  
9 built by Bi-Chang Chen. This platform fascinatingly features (1) Bessel beam scanning,  
10 (2) dual illumination arms, (3) multiple software compatibility (µManager), (4) flexible  
11 objective combination, (4) large chamber as 12 mm×12 mm×25 mm, and (5) long-range  
12 xyz motorized stage (MS-2000, Applied Scientific Instrumentation, USA).

13

#### 14 **Tracking analysis with plugin “TrackMate”**

15 To track the infiltration of macrophage during regeneration, we utilized a plugin  
16 “TrackMate” in the Fiji software [61]. Since the z-sections focused were thin, we  
17 simplified the context by projecting z section with maximum intensity. To detect spots of  
18 interest, we selected LoG (Laplacian of Gaussian) detector with an estimated bulb  
19 diameter of 30 pixels. We used simple LAP tracker with maximum linking distance (50  
20 pixels), gap-closing maximum distance (15 pixels) and gap-closing maximum frame gap  
21 (3 frame gaps) to generate tracking paths. All spots and links were manually corrected.  
22 Filters (Y position and Quality) were used to exclude spots which did not interact with  
23 the pLL system or at low quality. To display, spots were labeled with radius ratio of

0.3~0.4 and tracks were presented with a color map set by Track index.

2

### **Nitroreductase (NTR)/Metronidazole-mediated neuromast ablation**

Embryos from the cross of *Et(HG7L)* and *Tg(-8.0cldnb:NTR-hKikGR)* were collected and screened for double positive ones. Freshly-made 10X stock of metronidazole (Mtz, M3761, SIGMA-ALDRICH) solution (20 mM Mtz, 1 % DMSO) were prepared. Larvae at 3 days post fertilization (dpf) were first treated with 1X working concentration of Mtz solution (2 mM Mtz, 0.1 % DMSO diluted in 0.3 % PTU containing 0.3X Danieau's buffer) for 3, 6, 9, 12 hours in the dark. Then, Mtz solution was replaced with several washes of fresh 0.3X Danieau's buffer for recovery. The treatment of Mtz solution was 12 hours to obtain the optimal ablation result.

12

### **Pharmacological inhibitors**

All the chemical inhibitors were diluted in distilled water except for AG1478 (T4182, SIGMA-ALDRICH, in dimethyl sulfoxide (DMSO)) and LMT-28 (SML1628, SIGMA-ALDRICH, in methanol). Therefore, we used either 0.1 % DMSO or 0.1 % methanol as negative controls of AG1478 or LMT-28 treatments. AG1478 was added at 3  $\mu$ M to the medium right after tail amputation. To disrupt different signaling pathways during Mtz ablation, we treated 3 dpf larvae with designated drugs together with Mtz. After neuromast ablation, the chemical inhibitors was either washed out with Mtz or added back to be kept in the medium. The COX inhibitor Diclofenac sodium salt (D6899, SIGMA-ALDRICH), a specific blocker of neutrophil recruitment, was used at 3  $\mu$ M. The TNF $\alpha$  inhibitor pentoxifylline (PTX, P1784, SIGMA-ALDRICH) was used at 35  $\mu$ M.

1 The IL-6 inhibitors LMT-28 and the Wnt/ $\beta$ -catenin inhibitor IWR-1 (I0161, SIGMA-  
2 ALDRICH) were both used at 10  $\mu$ M.

3

#### 4 **Liposome Injection for macrophage ablation**

5 To kill macrophages, 3-dpf larvae were anesthetized with 0.016 % Tricaine/Ethyl 3-  
6 aminobenzoate methanesulfonate salt (A5040, SIGMA-ALDRICH) and microinjected  
7 with 5-8 nL of liposome encapsulated clodronate (SKU# CLD-8909, Clodrosome) into  
8 the circulation system via the Duct of Cuvier. The injection needle was prepared using  
9 borosilicate glass microcapillary needles (Sutter Instrument CO., B100-75-10, 1 mm  
10 O.D. X 0.75 mm I.D. , Novato, CA, USA) with a Sutter puller (P-97, Sutter Instrument)  
11 with the following settings for shorter tip: air pressure 500, heat 510, pull 100, velocity  
12 200, time 60 [62]. Control liposomes supplied in the kit were used as controls.

13

#### 14 **Statistical analysis with R software**

15 All experimental values except Fig. 7 are presented as mean  $\pm$  standard error and were  
16 analyzed by one-way ANOVA. The number in bottom or above the bar indicates the total  
17 sample number in one experimental condition. Groups denoted with different lettering  
18 refer to statistical significance ( $p < 0.05$ ). In Fig. 7, raw data obtained from TrackMate  
19 plugin, including spots, links and tracks information were further processed, analyzed and  
20 presented as scatter plot or histogram by “ggplot2” package in the R software.

21

22



# 1 RESULTS

## 2 Regeneration of neuromast post fin amputation

3 To investigate how the pLL system regenerates the entire neuromasts, we removed the  
 4 distal neuromast cluster (L6-8) by amputating the caudal fin of a larva from an enhancer-  
 5 trap line, *Et(HG7L)*, which expresses strong enhanced green fluorescent protein (eGFP)  
 6 in both MCs and INCs in the lateral line (Supplementary Fig. S1), at 3 days post  
 7 fertilization (dpf) as indicated in Fig. 1B. We observed the change of fluorescent lateral  
 8 line at designated time points in bright and dark fields under an epi-fluorescent  
 9 microscope. A significant portion of larvae grew a new neuromast near the wound site  
 10 within days. We break the entire process into three phases. Phase I: no cell clustering;  
 11 Phase II: cell clustering; Phase III: formation of a new neuromast (Fig. 1C). At one day  
 12 post fin amputation (dpa), the majority of larvae (92.7%, n = 70) stayed at the Phase I.  
 13 However, they quickly shifted to the Phase II in 78.7% of larvae at 2 dpa. We reasoned  
 14 that the formation of cluster is due to active cell proliferation, so cell proliferation at the  
 15 lateral line was examined by BrdU labeling (Fig. 1E). Even though no cell clustering was  
 16 noted at Phase I, cell proliferation did occur near the cut site of the lateral line. It  
 17 suggested that cells gradually pile up to form a cluster as seen in Phase II.

18 A rosette appears in the center of a developing neuromast [17]. We also observed the  
 19 formation of rosette expressing intensified eGFP signal (Fig. S2C, arrowheads) in the  
 20 center of a regenerating cluster of a fin-amputated larva from the cross of *Tg(-*  
 21 *8.0cldnb:lyn-GFP)* and *Tg(-4.7alpl:mCherry)* lines (Fig. S2B) [49, 63]. Tight junctions  
 22 are formed during apical cell assembly in the rosette [17]. We, therefore, confirmed the

1 existence of rosette by immunostaining against ZO-1, a tight junction associated protein  
 2 [63], in 2-dpa *Et(HG7L)* larvae within the regenerating cluster (Fig. S2D). Interestingly,  
 3 the cluster requires a larger area ( $1715.4 \mu\text{m}^2$ ,  $n = 10$ ) and a smaller length/width ratio  
 4 (6.79,  $n = 10$ ) to accommodate one rosette, with its center mostly situated in the middle  
 5 of cluster ( $n = 16$ ) (Fig. S2E). At 4 dpa, more than half of larvae (55.8 %) had regenerated  
 6 a new neuromast during observation.

7       Next, we examined the regeneration process more thoroughly under light-sheet  
 8 fluorescence microscopy (LSFM), which is less photo-toxic and allows long-term  
 9 recording [64]. Multiple active cell protrusions (arrowheads) were observed in the  
 10 leading end of pLL system of larvae at both Phase I & II stages (Supplementary Video 1  
 11 & 2). Unlike traditional collective migrations such as the pLLp migration during  
 12 development, new cells climbed onto the original pLL system and migrated toward injury  
 13 sites at Phase I and visible protrusions were found at the lagging end of cluster at Phase  
 14 II. Afterwards, the homogenous cell cluster transformed into polarized cells with ring-like  
 15 features of MCs within a new neuromast (Supplementary Video 3). Altogether, a new  
 16 neuromast regenerates by active cell proliferation, clustering and stochastic cell  
 17 migrations that is dissimilar to typical cell movements during pLLp development.

18

19 **Interneuromast cell is the major cell type contributing to neuromast**  
 20 **regeneration post fin amputation**

1 It is well known the loss of neuromast hair cells is replenished by underlying supporting  
2 cells (SCs) [65] driven by differential Wnt or Notch signaling [6]. In contrast, the roles of  
3 MCs and INCs are less appreciated. MCs seem to stay in quiescence unless facing severe  
4 damage [6]. Given that different injury levels may arouse differential regeneration  
5 responses of the pLL system, we examined which type(s) of neuromast progenitor cell  
6 is/are the major progenitor(s) for regenerating neuromasts post fin amputation. Since the  
7 *Et(HG7L)* line also expresses weak eGFP in a portion of SCs, we first used their larvae  
8 crossing with *Tg(-4.7alpl:mCherry)* lines with dim mCherry (red) fluorescence found in  
9 only MCs and INCs (Fig. S1M). It appeared that the clusters are mainly showing  
10 overlapping signals in the regenerating cluster at 2 dpa (Fig. 2A). Moreover, we crossed  
11 the *Et(HG7L)* line with the *Tg(-8.0cldnb:lyn-GFP)* line expressing strong membrane-  
12 bound eGFP in all neuromast cell types and found that the clustering cells showed both  
13 membrane and cytosol eGFP in all cells (Fig. 2B). This both suggested that the clustering  
14 cells are mainly from MCs and INCs but not SCs.

15 Since none of *in vivo* labeling method or transgenic line is available to distinguish  
16 MCs and INCs for their roles in neuromast regeneration, we established a double  
17 transgenic line, *Tg(-8.0cldnb:NTR-hKikGR; myl7: egfp)*, with a *claudin-b* promoter  
18 driven expression of a fusion protein of nitroreductase (NTR) [66] and a photo-  
19 convertible fluorescent protein (humanized Kikume Green-Red, abbreviated as hKikGR  
20 hereafter) [67] in all cell types of the pLL system (Fig. S3A). A *myl7*-driven eGFP gene  
21 was also included for making fluorescent heart as a selection marker. The NTR-driven  
22 cell ablation will not be mentioned until later experiments. Here, the hKikGR protein was  
23 expressed in punctate [56] in all cell types within neuromasts of the entire lateral line

1 system, including anterior and posterior lateral lines (Fig. S3B-C).

2 We amputated tail fins of 3-dpf larvae from the cross of *Tg(-8.0cldnb:NTR-hKikGR)*  
 3 and *Et(HG7L)* lines and then photo-converted hKikGR protein within the distal  
 4 neuromast into red signals by ultraviolet light (Fig. 2C-E, dashed rectangles). Two days  
 5 after amputation, we found red-fluorescent cells stay in the original neuromast in most  
 6 larvae (Fig. 2F). Only two out of 31 larvae had a few red-fluorescent cells outside the  
 7 original neuromast (Fig. 2G, asterisks). It further suggests that INCs, but not SCs nor  
 8 MCs are the major progenitor cell type to regenerate new neuromasts in the condition  
 9 tested.

10

## 11 **Fin amputation weakens lateral line nerve signal and upregulates** 12 **interneuromast cell Wnt activity**

13 To understand how INCs are aroused from a quiescent state (Fig. 3A), we first  
 14 investigated whether pLLn or SWC was affected after tail amputation due to the reported  
 15 inhibition of Wnt signaling by epidermal growth factor receptor (EGFR) pathway  
 16 between SWC and pLLn [26]. We collected larvae from the cross of *Tg(-*  
 17 *4.7alpl:mCherry)* and *Tg(FoxD3:GFP)* [50] to reveal the pLL system and SWCs,  
 18 respectively. Larvae were fixed at 2 hours post amputation (hpa), 6 hpa, 1 dpa and 2 dpa,  
 19 and then subjected to immunohistochemistry against acetyl tubulin to reveal the pLLn.  
 20 Although we expected to see possible retraction of injured nerves [68], unexpectedly,  
 21 both pLLn and SWCs appeared to stay in parallel with distal end of INCs (Fig. 3B,

1 dashed lines with arrowheads indicated). However, we found that the fluorescent  
2 intensity of pLLn but not SWCs was reduced (at least 60 % compared to proximal end)  
3 approaching the distal end (Fig. 3B, left panels) by quantifying averaged intensity at the  
4 GFP channel (Fig. 3B, dashed brackets) every 20  $\mu$ m from the cutting edge. The  
5 reduction of signals from 6-hpa (orange curve) and 1-dpa larvae (yellow curve) obviously  
6 showed a steeper slope (Fig. 3C) compared to those at 2 hpa or 2 dpa (Fig. 3D, red and  
7 green curves, respectively). The reduced pLLn signals implied a potential local  
8 diminishment of *neuregulin 1* (*nrg1*) within pLL nerves which may alleviate Wnt  
9 inactivation in distal INCs [26].

10 We then blocked EGFR pathway by a EGFR tyrosine kinase inhibitor, AG1478, post  
11 fin amputation [69]. The AG1487-treated larvae appeared to have faster recovery of new  
12 neuromasts at 2 dpa (Fig. 3D, 13.5 %, n = 57) compared to untreated fish (Fig. 1D, 2.9  
13 %, n = 70). Notably, almost all larvae (Fig. 3D, 91.6 %, n = 48) accomplished neuromast  
14 regeneration at 4 dpa. To have a more detail observation in real time, we observed the  
15 neuromast regeneration process under LSM. Astonishingly vigorous cell divisions were  
16 found (Supplementary Video 4, cell before mitosis labeled by white asterisk, daughter  
17 cells marked by magenta asterisks). Besides, considerable number of cell protrusions in  
18 various directions were observed (Supplementary Video 4, arrowheads). It suggests that  
19 pLLn and SWC play a dominant role in modulating the progenitor status of INCs not  
20 only during development [25, 26] but also regeneration.

21 Since SWCs maintained INCs in a quiescent progenitor by inhibiting Wnt/ $\beta$ -catenin  
22 signaling, we next asked whether Wnt reactivation occurs within the pLL system during  
23 regeneration. By crossing a Wnt reporter transgenic fish, *Tg(6XTcf/Lef-miniP:d2GFP)*

[53] to the *Tg(-4.7alpl:mCherry)* line, we noticed a subpopulation of INCs presenting d2GFP protein (degenerated form) at the distal end from 1 dpa (Fig. 4A-B, n = 17/33). From the close-up view (dashed rectangles with enlarged and split channels shown on right hand side), these subpopulation seemed to correspond with emerging cells which appeared besides existing ones, climbed up and moved toward the injury site (Supplementary Video 1, arrows). Moreover, while cluster appeared at 2 dpa, the regime of Wnt activity expanded as expected (Fig. 4C-D, n = 33/37), with a significant increase in area and range (defined as the distance between proximal and distal end of d2GFP signals) (Fig. 4E-F). These observations suggest that the elevation of Wnt activity within INCs post fin amputation (Fig. 4G).

11

## 12 **Activation of interneuromast cells even in the presence of intact**

### 13 **Schwann cells and lateral nerves**

The whole neuromast could be destroyed by 100  $\mu$ M copper sulfate but kept nearby nerve system unharmed [7, 20]. Under this somehow “more” specific ablation, no regeneration of neuromast was observed [31]. It supports the overwhelming inhibition signals coming from pLLn and SWC on the regeneration capacity of INCs. To further test this hypothesis, we used the *Tg(-8.0cldnb:NTR-hKikGR)* line, which specifically expresses nitroreductase in lateral line (Fig. S3). More importantly, we identified a founder fish, which expresses stronger NTR-hKikGR signals in neuromasts compared to that of INCs (Fig. S3B). This line allowed us to chemically kill neuromasts without damaging INCs. To validate this chemical ablation method, we crossed this fish with *Et(HG7L)* to reveal

1 the pLL system and then treated the larvae with metradinazole (Mtz) at 3 dpf. The green  
2 fluorescence in neuromast cells was gradually abolished while that of INCs remained  
3 unchanged within a half-day incubation of Mtz (Fig. 5B-D). The loss of fluorescence  
4 implied the death of cells. By TUNEL assay, we found that cell apoptosis only occurred  
5 within neuromasts but not INCs. In addition, SWC and the pLLn were both unharmed in  
6 Mtz-treated larvae (Fig. 5F-G). Therefore, this NTR/Mtz ablation system appears to be a  
7 convincing approach to specifically kill cells in neuromasts without affecting nearby  
8 cells.

9 We thus incubated 3-dpf *Tg(HG7L; -8.0cldnb:NTR-hKikGR)* larvae with Mtz for 12  
10 hours and then washed out to see whether the ablated L3 neuromast could be regenerated.  
11 We observed the gap of the missing neuromast was filled, but most fish (30/34) did not  
12 regenerate the L3 neuromast even at 4 days after the washout of Mtz (Fig. 5H-J).  
13 However, a few larvae (4/34) still formed a cluster at 2 days post Mtz washout (Fig. 5L)  
14 and two of them (2/34) even regenerated neuromasts at 4 days post washout (Fig. 5M).  
15 This suggests other factors might override the inhibition from pLLn/SWC to activate  
16 INCs.

17

## 18 **Macrophages relieve the neural inhibition on interneuromast cells in a** 19 **cytokine-independent manner**

20 It is well known that neutrophil infiltration is the first line of innate immune response. We  
21 hypothesized that infiltration of leukocytes may be involved in the regulation of

neuromast regeneration. Using *Tg(mpx:eGFP)* larvae, we observed that neutrophil recruitment reached a peak at 6 hours and declining within one day post injury. The neutrophil recruitment could be effectively inhibited by diclofenac, a cyclooxygenase (COX) inhibitor [48, 70] (Fig. S4). We first inhibited the neutrophils recruitment by treating tail-amputated 3-dpf larvae with diclofenac, but still observed a similar regime of neuromast regeneration (Fig. S5A). We further eliminated macrophages with the injection of control or clodronate-loaded liposome (clodrosome), which induce apoptosis of phagocytes [48, 71], into blood circulation via the heart of a 3-dpf larva before tail amputation. Interestingly, regeneration process was slowed down with less than half of larvae (11.5 %) regenerating a new neuromast at 4 dpa in the absence of macrophages (Fig. S5B), supporting the involvement of macrophages in neuromast regeneration upon tail amputation.

To test whether macrophages are involved in the residual regeneration capacity seen in Mtz-treated larvae retaining strong inhibition from intact SWCs, we treated larvae with clodrosome and found significantly hampered neuromast regeneration by inhibiting macrophages (Fig. 6H). This suggests an independent role of macrophages in alleviating the inhibition signals from pLLn. Using larvae from the cross of *Tg(HG7L; -8.0cldnb:NTR-hKikGR)* and *Tg(mpeg1:mCherry)*, a macrophage reporter line [51], we observed that some resident macrophages originally positioned around neuromast (Fig. 6A), then were recruited to the injured neuromast in a polarized and lobulated morphology (Fig. 6B-D). Polarization status has been reported as important features of M1 or M2 macrophages [36]. The M1 macrophages act as pro-inflammatory cells to engulf apoptotic cells (indicated by arrowheads, as green signals within red cells). In a



1 later phase, M2 macrophages, transformed from the M1 status, display dendritic  
2 morphology and are essential for inflammation resolution (anti-inflammatory) and tissue  
3 modeling. At 2 dpMtz, many elongated macrophages were still seen to interact with the  
4 injured pLL system compared to only a few neutrophils (yellow asterisk) existed in larvae  
5 from the cross of *Tg(mpeg1:mCherry; mpx:GFP)* [52] and *Tg(HG7L; -8.0cldnb:NTR-*  
6 *hKikGR)* (Fig. 6E-G).

7 Recently, accumulating evidences point to pivotal role of macrophages in wound  
8 repair and tissue regeneration mainly via secreted cytokine [72]. We thus blocked several  
9 candidate cytokines secreted by macrophages such as *tumor necrosis factor alpha*  
10 (TNF $\alpha$ ) and *interleukin-6* (IL-6) with pharmacological drugs including pentoxifylline  
11 (PTX) shown to inhibit *tnfa* transcription [73-75] and LMT-28 targeting the IL-6 receptor  
12  $\beta$  subunit (glycoprotein 130, gp130) [76]. Compared to the designated DMSO or  
13 methanol control, neither PTX nor LMT-28 treatment ruined the enduring capacity for  
14 neuromast regeneration (Fig. 6I). These results suggest that macrophages may exert their  
15 effect on neuromast regeneration in a cytokine-independent manner.

16

## 17 **Macrophages patrol in between injury site more often in later** 18 **regeneration phase**

19 To further understand the interaction between macrophages and regenerating neuromasts,  
20 we aimed to dissect more thoroughly their spatial and temporal relationship. First, the  
21 larvae from the cross of *Tg(mpeg1:mCherry; FoxD3:GFP)* and *Tg(-8.0cldnb:NTR-*

1 *hKikGR*); *Et(HG7L)*) were treated with Mtz and examined under LSM. Larvae were  
2 monitored in a wide-field of view (1.3 mm X 1.3 mm), focusing on neuromast L3 to L5,  
3 with about 200 z-sections (step size of 1  $\mu$ m) every five minutes (Fig. 7A). For analytic  
4 convenience, z sections were stacked by maximum intensity projection and then region of  
5 interest (ROI) was cropped for further image processing. We used the plugin  
6 “TrackMate” in Fiji software [61] to analyze mCherry-marked macrophages under red  
7 channel with manual corrections of spot labeling to indicate the center of a macrophage  
8 and spot linkage to show the migrating route of a macrophage at two continuing time  
9 points (Fig. 7A). We also excluded macrophages which did not in contact with the  
10 fluorescent pLL from the HG7L line by built-in filters. Every tracking path of individual  
11 macrophage could thus be presented by its index or displacement with color map (Fig.  
12 7A, right). By recording the location of each macrophage in different time points ( $x_n$ ,  $y_n$ ,  
13  $t_n$ ) we could acquire useful features to distinguish specific behaviors (Fig. 7B). For  
14 example, displacement against distance could be calculated by either the difference  
15 between the final and initial positions or the sum of every movement. Then, the velocity  
16 or speed of individual macrophage could be calculated.

17 As shown in the Supplementary Video 5, different cell dynamics of macrophages  
18 exist during regeneration. Therefore, we analyzed movies from two larvae each at 0 and  
19 10 hours post Mtz washout. As expected, some macrophages resided at the injury site for  
20 a long while (Fig. S6, arrows). In contrast, some macrophages patrolled across the injured  
21 site at different range and a few of them passed by rapidly (Fig. S6, arrowheads). This  
22 “patrol” behavior is characteristic of high speed-velocity ratio and frequent turns of  
23 direction (Fig. 7B, red arrows). To have a better view of different cell behaviors exhibited

1 by all macrophages in the whole-trunk region of Mtz-treated larvae, the scatter plot was  
 2 presented in Fig. 7C. Each circle represents one macrophage. More than half of  
 3 macrophages moved gently and slow ( $0.2\sim 2\ \mu\text{m}/\text{min}$ ). In contrast, a population of  
 4 actively moving macrophages (Speed:  $> 1\ \mu\text{m}/\text{min}$ , Velocity:  $< 0.4\ \mu\text{m}/\text{min}$ ,  
 5 Speed/Velocity  $> 4$ , Ratio of turns  $> 40\%$ ) increased significantly in later regenerative  
 6 phase at 1 day post Mtz washout (Fig. 7C, marked by a red rectangle in dashed line at the  
 7 bottom). For a better visualization, other macrophages out of this group are marked out  
 8 with a 'X'. This increase in active macrophage migration might be relevant to neuromast  
 9 regeneration.

10 To further quantify the distribution of macrophages along the pLL system, we  
 11 videotaped a Mtz-treated larva at 5 minutes per frame from 0-12 h post Mtz washout  
 12 (Supplementary Video 6). For analysis, we divided the trunk into 13 sections (S01-S13,  
 13 each with  $100\ \mu\text{m}$  in width) according to the chevron-shaped muscle segment which is  
 14 clearly marked in the *Et(HG7L)* line. We counted the number of recruited macrophages in  
 15 each section at each frame and presented a histogram to show the distribution and  
 16 average numbers of macrophage accumulated from all frames (Fig. 7D). It appeared that  
 17 more macrophages were recruited within sections containing injury sites (S04, S09, S11  
 18 and S12). Unexpectedly, uneven distribution of macrophages was found in sections  
 19 without injury sites (S5: 1.58 & S6: 1.11 vs. S7: 0.79 & S8: 0.62). This clearly indicates  
 20 the injury-induced recruitment of macrophages and implies a possible involvement of  
 21 macrophage in neuromast regeneration. Altogether, we hypothesized that the more  
 22 frequent macrophage patrolling around injured neuromasts in later phase of regeneration  
 23 may account for the residual regeneration capacity in Mtz-treated larvae.

1

## 2 **Macrophage intervention may lift the neural inhibition of** 3 **interneuromast cells**

4 By close examination of those *in toto* time-lapse movies through z-axis, we found  
5 macrophages were situated from the top surface to the bottom of trunk (Supplementary  
6 Video 7). Macrophages often crawled on INCs with underneath SWCs in close proximity.  
7 Interestingly, we observed that some macrophages protrude into the limited space in  
8 between INCs and SWCs. To go more in detail, we thus examined this hierarchical  
9 structure under confocal microscopy at a higher magnification using a 63X oil lens to  
10 dissect the positions of macrophage, INCs and SWCs along the Z-axis and further  
11 clarification in orthogonal views (Fig. 8A-C). Normally, macrophages lied on top of  
12 INCs and SWCs as shown in Fig. 8A. However, macrophages could squeeze into the tiny  
13 space between INCs and SWCs as shown in Fig. 8B,C. It implies that the macrophage  
14 may interfere with the physical contact between INC and SWC.

15 Upon the second lateral line development, the INCs on the first lateral line are  
16 pushed ventrally by the migrating 2<sup>nd</sup> primordium to be far away from the inhibitory  
17 signal of SWCs. This activates the quiescent INCs to form intercalary neuromasts. It  
18 suggests the close relationship between INCs and SWCs is critical to keep INCs silent.  
19 We thus hypothesized that the macrophage infiltration could step in to block the neural  
20 inhibition. To test this, we first analyzed whether Wnt activity is upregulated in the Mtz-  
21 treated larvae. Indeed, increased Wnt activity was seen in lateral line cells or cell clusters  
22 during regeneration in Mtz-treated larvae from the cross of *Tg(mpeg1:mCherry*; -

1 *8.0cldnb:NTR-hKikGR*) and *Tg(-4.7alpl:mCherry; 6XTcf/LefBS-miniP:d2GFP)* (Fig. 8D-  
2 E). Interestingly, some macrophages (enclosed in white dashed line) were observed in  
3 close physical contact with INCs (enclosed in red dashed line) with upregulated Wnt  
4 activity (enclosed in green dashed line) (Fig. 8D-E, lower panels). Furthermore, the  
5 inhibition of Wnt signaling by IWR-1, a  $\beta$ -catenin complex stabilizer [77], the residual  
6 regeneration capacity were almost completely abolished (Fig. 8F), implying the effect of  
7 macrophages works through the activation of INCs with Wnt signaling.

8

## 9 **DISCUSSION**

10 The keys to unravel the mystery of regeneration are the identification of progenitor cells  
11 complementing the loss of organs and the underlying induction mechanism therein. In  
12 this study, we removed the L6-8 lateral line neuromast in zebrafish larvae by tail  
13 amputation or genetic-chemical ablation of the L3 neuromast, and found unequivocally  
14 the nearby INCs can be activated to form a new neuromast. The activation of INCs is at  
15 least in part by alleviating the inhibition from pLLn/SWC via the intervening infiltration  
16 of macrophages.

17

18 We observed three sequential phases constituting the whole regeneration  
19 morphogenesis of neuromast. Similar morphogenesis sequence, from filling the gap  
20 (Phase I), cell clustering (Phase II) to neuromast regeneration (Phase III) had been  
21 reported by electroablation of neuromasts [31, 78]. Our data are in agreement with  
22 Sanchez *et al.* that INCs are multipotent progenitors for neuromasts by indirect labeling

1 or cell transplantation [31]. Furthermore, EGF signaling has been shown to be  
 2 unequivocal factor for keeping the quiescent status of INCs since perfect regeneration  
 3 could be achieved by inhibiting EGF signaling with AG1478 [31]. However, we observed  
 4 no gap filling activity before one day post injury that is in contrast to the work by  
 5 Sánchez et al. [31]. It is possible that electroablation might cause an instant injury of the  
 6 underlying SWCs and pLLn. As in our case the diminishing signal of pLLn in the nearby  
 7 region of cutting site might indicate a lower expression of Neuregulin 1 type III (Nrg1-3)  
 8 which is involved in the migration, proliferation and differentiation of SWCs [27] via the  
 9 receptor, ErbB2 or ErbB3, of SWCs [25, 79]. This tripartite relationship is well  
 10 established to explain precocious intercalary neuromast formation with the interruption of  
 11 this ErbB/Neuregulin pathway [26]. Whichever mechanisms they adopted, INCs could  
 12 respond to neuromast ablation as multipotent progenitors by proliferating and  
 13 replenishing the loss of organ.

14

15 Tissue damage, either sterile or infectious, usually accompanies with innate  
 16 immunity to protect the organism at the first front line. This inflammatory response  
 17 features sequential recruitment of different leukocytes to the injury site [34]; neutrophils  
 18 serves as pioneers while macrophages arrives later on as typical immune process that  
 19 were seen previously in zebrafish [70, 80, 81] and also evident in our finding (Fig. S4).  
 20 Neutrophils are capable of eliminating pathogens by phagocytosis and maintaining  
 21 inflammation with IL1- $\beta$  secretion [82]. This inflammation is augmented by myeloid  
 22 cells and surrounding injured cells. It further recruits macrophages to participate in a  
 23 positive feedback loop. Moreover, macrophages with morphology change from round to

dendritic shape were also reconfirmed in our data (Fig. 6A-D) that the polarity transition from M1-like (pro-inflammatory) to M2-like (non-inflammatory) [37] was almost completed within one day post injury. This transition, also known as inflammation resolution, was triggered by the inhibition of IL1- $\beta$  signaling through TNF $\alpha$  secretion [83] and efferocytosis, a process that activated or infected neutrophils are engulfed by M1-like macrophages [38]. Thus, prolonged inflammation was detrimental since it not only induce more apoptosis but threaten regeneration [84]. Interestingly, M1-like macrophages could promote zebrafish fin regeneration through TNF $\alpha$ /TNFR1 on blastema cell proliferation [41] and stimulate myogenic precursor cells in mammals to divide through secretion of TNF $\alpha$ , IL1- $\beta$  and IL-6 [85-87]. This promotion likely relies on alleviation of IL1- $\beta$  signaling, achieving inflammation resolution, instead of cell debris clearance or cell death prevention [83]. On the other hand, as being anti-inflammatory, M2-like polarized macrophages could also be involved in inflammation resolution via secretion of anti-inflammatory molecules such as TGF- $\beta$ 1 or IL-10 and further tissue remodeling [36, 41]. In our hands, the residual regeneration capacity was not affected by inhibiting TNF $\alpha$  signaling, indicating M1-like macrophages may not play an essential role through secretion of TNF $\alpha$ . Nevertheless, we need further investigations like the ablation of macrophages at different time points after injury or the use of transgenic line, *Tg(tnfa:eGFP-F)* to distinguish two classes of macrophages [36], in order to resolve the contribution of M1-like or M2-like macrophages in the neuromast regeneration.

We performed macrophage tracking post injury with wide-field acquisition and

1 categorized individual cell behaviors as “Stay”, “Patrol” and “Flash”. Tracking analyses  
2 of immune cells after tissue loss were previously conducted in fin or retina regeneration  
3 [36, 70, 81, 88, 89] but carried out with simple parameters such as velocity and speed.  
4 With these parameters, cell heterogeneity was established between peripheral and  
5 resident macrophages [89], or macrophages behaviors upon different injury condition  
6 [88]. We introduced more parameters revealing direction (Velocity/Speed), orientation  
7 (Turns) and phase to identify novel cell subclasses. While patrolling macrophages  
8 increase in later phase of regeneration (1 dpMtz), all three behaviors appeared in both  
9 early (0 dpMtz) and late phase. That means, this novel categories may not specifically  
10 correspond to M2-like macrophage which could be further subdivided into M2a, M2b  
11 and M2c subclasses in mammals [90]. Furthermore, macrophages seems to stay in hot  
12 zones and shuttle in between SWCs and INCs with high z-resolution analysis. Thus, we  
13 hypothesize that more certain M2-like macrophages (1 dpMtz) could interrupt the  
14 connection between SWCs and INCs in specific region via unknown mechanism. The  
15 dissociation ability could be either physical or chemical. Physical force could be  
16 generated by macrophages to adhere and connect the ruptured blood vessels [47]. INCs  
17 were also witnessed to be pushed away while macrophages passed. Further *in vivo*  
18 dynamics of actin filaments regulated by phosphatidylinositol-3-kinase (PI3K) or Ras-  
19 related C3 botulinum toxin substrate 1 (Rac1) could possibly help reveal the filopodia or  
20 lamellipodia-dependent cellular action. Chemical reaction could be extracellular matrix  
21 (ECM) remodeling by matrix metalloproteinases (MMPs) from macrophages [91]. ECM  
22 remodeling further mediating leukocyte recruitment was proved to be regulated by  
23 critical expression of MMPs family enzyme such as MMP-9 or MMP-13 and be crucial



1 to heart regeneration in zebrafish [92]. Interestingly, since macrophages are supposedly  
 2 gifted to separate INCs and SWCs, they were found to frequently visit along the  
 3 migratory trajectory of 2<sup>nd</sup> pLLp. Whether macrophages promote intercalary neuromast  
 4 formation via dissociation of SWCs and 1<sup>st</sup> lateral line needs to be further investigated.  
 5 Therefore, we hypothesize here that macrophages could play essential role of separating  
 6 INCs and SWCs both in development and regeneration. In development, while  
 7 macrophages could digest the linkage between SWCs and 1<sup>st</sup> lateral line, 2<sup>nd</sup> primordium  
 8 could help create enough space physically to alleviate the inhibition from SWCs,  
 9 resulting robust intercalary neuromast formation. During regeneration, M2-like  
 10 macrophages could only separate SWCs and INCs by itself. Limited freedom of neural  
 11 inhibition with minimal gap between INCs and SWCs generated by individual  
 12 macrophages thus lead to low successful rate of regeneration. Macrophages are recently  
 13 well-known to participate widely in development, homeostasis and regeneration [35, 93],  
 14 this the first study to suggest that macrophages could support different scenario, i.e.  
 15 regeneration and development in zebrafish lateral line, by utilizing similar mechanism.

16  
 17 In conclusion, the inhibition from SWCs and lateral line nerves is the key factor  
 18 keeping the quiescence of INCs. The quiescence of INCs can be alleviated by fin  
 19 amputation or possibly via intervening macrophage in between lateral line and SWCs. In  
 20 both cases, the regeneration of neuromast can be blocked or delayed by inhibiting  
 21 macrophages. Macrophages may also be involved in intercalary NM formation during  
 22 development. Altogether, our results strongly suggest that macrophages may participate  
 23 in the development of neuromast. More importantly, they play a pivotal role in awaking

1 interneuromast cells to regenerate neuromasts in an injured lateral line in zebrafish.

2

### 3 **ACKNOWLEDGEMENTS**

4 We thank Dr. Tatjana Piotrowski from Stowers Institute for Medical Research for  
5 providing p5E-8.0*cldnb* plasmid. We thank Dr. Aaron Steinier from Pace University for  
6 providing *Tg(-4.7alpl:mCherry)* transgenic fish. We thank Dr. Chung-Der Hsiao from  
7 Chung Yuan Christian University in Taiwan for providing pME-NTR-hKikGR plasmid.  
8 We thank Taiwan Zebrafish core facility for providing several transgenic lines used in  
9 this study. We thank Ms. Shu-Chen Shen in Advanced Optical Microscope Core Facility  
10 in Agricultural Biotechnology Research Center in Academia Sinica for great assistance  
11 with light sheet microscope. We thank Ms. Yi-Chun Chuang in Technology Commons in  
12 National Taiwan University for excellent assistance with confocal microscopy. The  
13 authors would also like to express great appreciation to the staffs of the zebrafish Core at  
14 National Taiwan University for the assistance in fish maintenance. The work was  
15 supported by grants from the Ministry of Science and Technology, Taiwan (MOST 108-  
16 2311-B-002-015; MOST 109-2311-B-002-020) to SJL.

17

18

# 1 **FIGURE LEGENDS**

2 **Figure 1.** *Active cell proliferation and clustering occur during neuromast regeneration*  
3 *upon fin amputation.* (A) A cartoon shows different cell types in a neuromast of lateral  
4 line. (B) A cartoon shows one side of the fluorescent posterior lateral (in green) with L1-  
5 8 neuromasts of a *Et(HG7L)* larva at 3 days post fertilization and the tail fin is clipped at  
6 the dashed line to remove neuromast L6-8. (C) A new neuromast was regenerated in  
7 three distinct phases as examined at GFP channel under epifluorescent microscopy. Phase  
8 I: No notable increase in fluorescent cells were observed in the lateral line between the  
9 L5 neuromast (as labeled) and the cut site (dotted line). Phase II: Fluorescent cells were  
10 increased and aggregated to form a cluster (arrowhead). Phase III: A new neuromast was  
11 formed (arrow). The corresponding bright field images for each phase are shown below.  
12 (D) The percentages of larvae at each phase were calculated at designated day post  
13 amputation (dpa, N = 3, n = 70). (E) HG7L larvae were fin-amputated, fixed at 1 and 2  
14 dpa and subjected BrdU staining (in magenta) to probe actively proliferating cells or GFP  
15 immunohistochemistry (in green) to stain lateral line. Active cell proliferation was  
16 observed near the cutting edge at 2 dpa and quantified as shown in a scatter plot on the  
17 right.

18  
19 **Figure 2.** *Interneuromast cells are the origin of clustering cells post fin amputation.* We  
20 performed fin amputation on double transgenic larvae from the cross of the *Et(HG7L)*  
21 with the *Tg(-4.7alpl:mCherry)* (alpl:mCherry) or *Tg(-8.0cldnb:lyn-GFP)* (cldnb:lynGFP)  
22 to track the origin of progenitor cells for the regenerating cluster post fin amputation at  
23 two days after amputation (2 dpa). (A) The regenerating cluster of fin amputated-larvae

1 of *Et(HG7L)XTg(-4.7alpl:mCherry)* lines was examined at GFP or mCherry channel and  
2 photographed under confocal microscopy. A representative superimposed image from  
3 both channels is shown. The regenerating cluster image contains mostly yellow signal. As  
4 illustrated in a cartoon above, the clustering cells could be originated from both  
5 interneumast cells (INCs) and mantle cells (MCs). (B) The regenerating cluster of fin  
6 amputated-larvae of *Et(HG7L) X Tg(-8.0cldnb:lyn-GFP)* was examined at GFP channel  
7 to scan the z-axis. Images at three different z positions clearly show the existence of both  
8 membrane and cytosol green fluorescence. As illustrated in a cartoon above, the signals  
9 could be originated from INCs, MCs and supporting cells. (C) A series of cartoons show  
10 the scheme of utilizing a *Tg(-8.0cldnb:NTR-hKikGR; myl7:EGFP)* transgenic line, which  
11 expresses nitroreductase (NTR) and hKikGR fusion protein, to further discern whether  
12 the clustering cells are from INCs or cells inside a neuromast. To label the lateral line, we  
13 used larvae from the cross of *Et(HG7L)* (green) and *Tg(-8.0cldnb:NTR-hKikGR;*  
14 *myl7:EGFP)* (green dots), examined and photographed at GFP channel before (D) and  
15 after UV exposure (E). After UV exposure, the green *hKikGR* dots were converted to red,  
16 in all cell types including MCs within distal neuromast right after fin amputation. (F) At 2  
17 dpa, labeled cells generated new green hKikGR protein. The mingling of green and red  
18 signals become yellow as shown in (F). The labeled cells within the neuromasts rarely  
19 escaped in most treated larvae (29/31). However, we observed that a few larvae (2/31)  
20 showed yellow signal in the neighboring of INCs (white asterisks) as shown in (G).

21

22 **Figure 3.** *Diminished nerve inhibition near the cut site may allow neuromast*

23 *regeneration from interneuromast cells.* (A) A cartoon shows the close contact between

1 interneuromast cells (INCs, red) with underlying Schwann cells (SWCs, light green) and  
 2 posterior lateral nerve (pLLn, dark green). The pLLn- derived nrg1-III can activate  
 3 erbb2/3 receptors on SWCs to suppress Wnt activity in INCs, thus keeps INCs in a  
 4 quiescent state. (B) The *Et(HG7L)* larvae at 3 day post fertilization (dpf) were treated  
 5 with 3  $\mu$ M of AG1478, fin amputated to examine neuromast regeneration according to  
 6 Fig. 1C. (C) The 3-dpf larvae from the cross of *Tg(-4.7alpl:mCherry)* and  
 7 *Tg(foxd3:EGFP)* were tail fin amputated and immobilized at designated time to show the  
 8 integrity of SWCs in green (labeled by *Tg(FoxD3:GFP)* in all stages examined (right  
 9 column). *Tg(-4.7alpl:mCherry)* larvae with red fluorescent lateral line at 3 dpf were also  
 10 tail fin-amputated, fixed at designated hours or days post amputation (hpa or dpa,  
 11 respectively) and subjected to immunostaining against acetyl tubulin to reveal green  
 12 nerves along the red lateral line (left column). It appeared that the fluorescent intensity of  
 13 green pLLn is diminishing approaching the cut site (dashed line). So, we measured the  
 14 green fluorescent intensity at decreasing distance from the cut site in cropped images as  
 15 depicted by a dotted rectangle as shown in the image of 1-dpa larva. The averaged  
 16 intensity was calculated and normalized with those of the proximal region (200-300  $\mu$ m  
 17 from cutting edge, blue background) for designated times shown by different colors (D).  
 18 Data is presented as mean  $\pm$  s.e.m..

19

20 **Figure 4.** *Wnt* activity is enhanced in the lateral line near the injured site at 1-2-day post  
 21 amputation. Representative superimposed stacked images of two different larvae (A,C  
 22 and B,D) from the cross of *Tg(6XTcf/LefBS-miniP:d2GFP)* (green), and *Tg(-*  
 23 *4.7alpl:mCherry)* (red) at 1 day post amputation (dpa, A,B) and 2 dpa (C,D) are shown.

1 Elevated green Wnt activity was observed in and surrounding lateral line as shown in  
 2 (A). Interneuromast cells (arrows) near the wound site showed yellow signal due to the  
 3 superimposed color for red lateral line and green Wnt signal. Magnified diagrams for  
 4 each dashed-rectangle are shown next to the corresponding superimposed photo at green  
 5 or red channel. Scales are the same for all superimposed images as shown in (A). Scale  
 6 bars are 25  $\mu$ m in magnified images. (E-F) The areas and range of Wnt activity, defined  
 7 by measuring the extension from tail-cut to the most proximal end, were calculated and  
 8 shown. Data represents mean  $\pm$  s.e.m. and analyzed by one-way ANOVA comparing to  
 9 that of 0 dpa. In addition, the difference between 1 and 2 dpa were analyzed and shown.  
 10 \* $P < 0.05$ , \*\*\* $P < 0.0005$ . (G) A series of cartoons illustrate the elevation of Wnt activity  
 11 (yellow) during cluster formation.

12

13 **Figure 5.** *Chemical-genetic ablation of neuromasts blocks neuromast regeneration in*  
 14 *most but not all larvae.* (A) Larvae from the cross of *Et(HG7L)* (green) and *Tg(-*  
 15 *8.0cldnb:NTR-hkiKGR)* (green dots) were treated with 2 mM metrodinazole (Mtz) at 3  
 16 days post fertilization (dpf) for 12 h, washed out, cultured, examined and photographed at  
 17 designated h post Mtz treatment (hpMtz) as shown in a series of cartoons. (B-D)  
 18 Representative stacked images show decreasing size (enclosed by dashed lines) of  
 19 neuromast (asterisks) during Mtz treatment. (E) A cartoon shows the absence of  
 20 neuromast with undamaged Schwann cells and lateral nerve. (F) Apoptotic cells were  
 21 clearly labeled by the TUNEL staining in the Mtz-treated larva and the lateral nerve  
 22 (arrow) stayed undamaged. (G) Mtz was used to treat larvae from the cross of  
 23 *Tg(foxD3:GFP)* and *Tg(-8.0cldnb:NTR-hkiKGR)*. It appeared that Schwann cells

1 (arrowhead pointed green rod) appeared intact in compared to the disintegrating  
 2 neuromast (asterisk) in a representative stacked image. The faint broad green signal  
 3 underneath is stacked signals from underlying tissues. (H-J) After washing out Mtz, most  
 4 of interneuromast cells (30/34) in the proximity of ablated neuromasts did not form a new  
 5 neuromast. (K-M) A few (2/34) larvae had regenerated a neuromast (M) through cluster  
 6 formation (4/34) (L). Scale bars are the same in all panels but only shown in (B).

7  
 8 **Figure 6.** *Changes in phagocytes surrounding deteriorating neuromasts and their effects*  
 9 *on cluster formation.* Larvae from the cross of *Tg(mpeg:mcherry)* (red) and *Tg(-*  
 10 *8.0cldnb:NTR-hkiKGR;myl7:EGFP)* (green) were treated with metrodinazole (Mtz) as  
 11 described in Fig. 5, examined and photographed at designated hours or days post Mtz  
 12 treatment (hpMtz or dpMtz). We observed the disintegration of neuromasts post Mtz  
 13 treatment (A-D). Red macrophages (arrowheads) were recruited to engulf injured  
 14 neuromasts in a dendritic cell-like shape within hours post Mtz treatment (A-C). The  
 15 injured neuromast was disappeared, but macrophages were still retained in the injured  
 16 site at 1dpMtz. Please note that the macrophages became more compact round shape with  
 17 protrusions (D). (E-G) Triple-transgenic larvae as designated were treated as described  
 18 above, examined and photographed at 2 dpMz. Macrophages (red, white asterisks) were  
 19 still found in the posterior lateral line system, even in the presence of a new neuromast as  
 20 shown in (G). In contrast, only a few neutrophils (bright green, yellow asterisks) were  
 21 found. Scales are the same for each row, but only shown in the far-right panel. (H)  
 22 Larvae from the cross of *Et(HG7L)* and *Tg(-8.0cldnb:NTR-hKikGR;myl7:EGFP)* were  
 23 treated without (ctrl) and with 3  $\mu$ M diclofenac (with or without washout), control or

1 clodronate liposome (H), or treated with different cytokine inhibitors PTX (35  $\mu$ M) or  
2 LMT-28 (10  $\mu$ M) (I). The above treated larvae were undergone a 12-h Mtz treatment and  
3 scored for the % of larvae with cluster formation. Data represents mean  $\pm$  s.e.m. and  
4 analyzed by one-way ANOVA, \* $P$  < 0.05. n.s.: not significant.

5

6

7 **Figure 8.** *Infiltrated macrophages are found in between Schwann cells and*  
8 *interneuromast cells with higher Wnt activity in Mtz-treated larvae.* (A-C) Images shown  
9 are representative confocal stacked images of Mtz-treated larvae from the cross of  
10 *Tg(mpeg1:mCherry; FoxD3:GFP)* and *Tg(-8.0cldnb:NTR-hKikGR; Et(HG7L))* in  
11 orthogonal views, while the X-Z and Y-Z views at the position of yellow lines are shown  
12 below and on the right side, respectively. Macrophages (red) indicated by arrowheads  
13 were mostly crawling on interneuromast cells (INCs, brighter green, marked by magenta  
14 asterisks) in (A-B). In some cases, macrophages were found in between INCs and  
15 Schwann cells (SWCs, dim green, labeled by white asterisks). Scale bars are the same but  
16 only provided in (A) for respective images. (D-E) Images presented are representative  
17 stacked confocal images of Mtz-treated larvae from the cross of *Tg(mpeg1:mCherry; -*  
18 *8.0cldnb:NTR-hKikGR)* and *Tg(-4.7alpl:mCherry; 6XTcf/LefBS-miniP:d2GFP)*. Areas  
19 shown higher Wnt activity are boxed with dash lines and indicated by asterisks.  
20 Magnified diagrams for the dashed rectangles are shown in different color channels to  
21 reveal INCs (red, top panel), Wnt signal (dim green, dashed region, middle panel) and  
22 macrophage (red, dashed region, bottom panel). Interestingly, some macrophages  
23 (enclosed with white dashed line) were found to interact with these activated INCs. Scale



1 bar goes to 25  $\mu\text{m}$  or 10  $\mu\text{m}$  in magnified diagrams. (F) Larvae as above were treated  
2 without (ctrl) or with IWR-1 to disrupt Wnt activity and the percentages of larvae with  
3 cluster formation were counted as described previously. Data represents mean  $\pm$  s.e.m.  
4 and analyzed by one-way ANOVA,  $*P < 0.05$ .  
5  
6 **Figure 7.** *In toto* imaging analysis reveals differential cell behaviors and specific spatial  
7 distribution of macrophages during neuromast regeneration. (A) As shown in the  
8 flowchart, the trunk region including neuromast L3-5 were imaged *in toto* by light-sheet  
9 fluorescence microscopy (LSFM) to monitor macrophage behavior during neuromast  
10 regeneration. Larvae from the cross of *Tg(mpeg1:mCherry; FoxD3:GFP)* and *Tg(-*  
11 *8.0cldnb:NTR-hKikGR); Et(HG7L)*, a wide field of z-stack images focusing around the  
12 cloaca (dashed rectangle) was taken every 5 min. We then reduced the order to 3D (x,y,t)  
13 with stacking of z sections and processed to have a better resolution by subtracting  
14 background. Finally, we used the plugin “TrackMate” in the Fiji software and manually  
15 modified to acquire the tracking path of every macrophages (shown in right-bottom  
16 corner). (B) Distance (arrows) and displacement (arrows with dashed line) were  
17 measured to calculate speed and velocity as shown in (C). Turns were counted among  
18 cell movements (indicated by red) to generate the ratio of turns in (C). (C) A scatter plot  
19 shows specific speed (the X-axis) and velocity (the Y-axis) for each macrophage. Other  
20 features such as “Speed / Velocity”, “Ratio of turns” and “Stage” are also depicted as  
21 shown in the legends on the right to better distinguish different cell behaviors. A region  
22 with a speed lower than 25 and velocity smaller than 10 (dashed rectangle) was  
23 magnified as shown in the lower panel. (D) Histograms divided by sections (width of 100

$\mu\text{m}$ ) represent counts (the X-axis) of different number of recruited macrophages (the Y-axis) during neuromast regeneration. In each panel, the mean of “number of recruited macrophages” is shown in right-upper panel and presented with dashed lines in red.

**Figure 9. Mechanistic models for lateral line regeneration.** (A) Under normal conditions, the pLLn (thick dark green thread) nrg1-III-activated erbb2/3 receptors within Schwann cells (SWCs, light green) keep interneuromast cells, (INCs, bright green) quiescent by limiting the Wnt activity. Upon the loss of distal neuromasts by tail amputation, the lateral line nerve is weakened (thin light green thread) in the proximity of cutting edge to break the quiescence of INCs (red outlines). The Wnt activity in INCs is elevated and results in the formation of cluster. (B) Upon specific ablation of neuromasts by NTR-hKikGR protein (bright green spots)-induced by Mtz without damaging surrounding posterior lateral line nerve and SWCs, INCs remain quiescent by integral EGF inhibition. Most macrophages crawl onto INCs which result in filling the gap without successful neuromast regeneration. However, occasionally macrophages could infiltrate in between INCs and SWCs. This breaks the contact between INCs and SWCs and the inhibition of EGF signaling. INCs are then activated to be able to differentiate and regenerate new neuromasts through cluster formation.

# 1 REFERENCES

- 2 1. Newmark PA, Alvarado AS: **Bromodeoxyuridine specifically labels the**  
3 **regenerative stem cells of planarians.** *Developmental biology* 2000, **220**(2):142-  
4 153.
- 5 2. Wagner DE, Wang IE, Reddien PW: **Clonogenic neoblasts are pluripotent adult**  
6 **stem cells that underlie planarian regeneration.** *Science* 2011, **332**(6031):811-  
7 816.
- 8 3. Williams J, Holder N: **Cell turnover in neuromasts of zebrafish larvae.**  
9 *Hearing research* 2000, **143**(1-2):171-181.
- 10 4. Stone JS, Cotanche DA: **Hair cell regeneration in the avian auditory**  
11 **epithelium.** *International Journal of Developmental Biology* 2007, **51**(6-7):633-  
12 647.
- 13 5. Bermingham-McDonogh O, Rubel EW: **Hair cell regeneration: winging our**  
14 **way towards a sound future.** *Current opinion in neurobiology* 2003, **13**(1):119-  
15 126.
- 16 6. Romero-Carvajal A, Acedo JN, Jiang L, Kozlovskaja-Gumbrienė A, Alexander R,  
17 Li H, Piotrowski T: **Regeneration of sensory hair cells requires localized**  
18 **interactions between the Notch and Wnt pathways.** *Developmental cell* 2015,  
19 **34**(3):267-282.
- 20 7. Hernandez PP, Undurraga C, Gallardo VE, Mackenzie N, Allende ML, Reyes AE:  
21 **Sublethal concentrations of waterborne copper induce cellular stress and cell**  
22 **death in zebrafish embryos and larvae.** *Biological research* 2011, **44**(1):7-15.
- 23 8. Sinkkonen ST, Chai R, Jan TA, Hartman BH, Laske RD, Gahlen F, Sinkkonen W,  
24 Cheng AG, Oshima K, Heller S: **Intrinsic regenerative potential of murine**  
25 **cochlear supporting cells.** *Scientific reports* 2011, **1**:26.
- 26 9. Li H, Liu H, Heller S: **Pluripotent stem cells from the adult mouse inner ear.**  
27 *Nature medicine* 2003, **9**(10):1293.
- 28 10. Jan TA, Chai R, Sayyid ZN, van Amerongen R, Xia A, Wang T, Sinkkonen ST,  
29 Zeng YA, Levin JR, Heller S: **Tympanic border cells are Wnt-responsive and**  
30 **can act as progenitors for postnatal mouse cochlear cells.** *Development* 2013,  
31 **140**(6):1196-1206.
- 32 11. Shi F, Kempfle JS, Edge AS: **Wnt-responsive Lgr5-expressing stem cells are**  
33 **hair cell progenitors in the cochlea.** *Journal of Neuroscience* 2012,  
34 **32**(28):9639-9648.
- 35 12. Kang J, Hu J, Karra R, Dickson AL, Tornini VA, Nachtrab G, Gemberling M,  
36 Goldman JA, Black BL, Poss KD: **Modulation of tissue repair by regeneration**  
37 **enhancer elements.** *Nature* 2016, **532**(7598):201.
- 38 13. Liu S-Y, Selck C, Friedrich B, Lutz R, Vila-Farré M, Dahl A, Brandl H,  
39 Lakshmanaperumal N, Henry I, Rink J: **Reactivating head regrowth in a**  
40 **regeneration-deficient planarian species.** *Nature* 2013, **500**(7460):81.
- 41 14. Montgomery JC, Baker CF, Carton AG: **The lateral line can mediate rheotaxis**  
42 **in fish.** *Nature* 1997, **389**(6654):960.
- 43 15. Stewart WJ, Cardenas GS, McHenry MJ: **Zebrafish larvae evade predators by**  
44 **sensing water flow.** *Journal of Experimental Biology* 2013, **216**(3):388-398.
- 45 16. Dalle Nogare D, Nikaido M, Somers K, Head J, Piotrowski T, Chitnis AB: **In toto**

- 1 **imaging of the migrating Zebrafish lateral line primordium at single cell**
- 2 **resolution.** *Developmental biology* 2017, **422**(1):14-23.
- 3 17. Chitnis AB, Dalle Nogare D, Matsuda M: **Building the posterior lateral line**
- 4 **system in zebrafish.** *Developmental neurobiology* 2012, **72**(3):234-255.
- 5 18. Ghysen A, Dambly-Chaudière C: **The lateral line microcosmos.** *Genes &*
- 6 *development* 2007, **21**(17):2118-2130.
- 7 19. Olivari FA, Hernández PP, Allende ML: **Acute copper exposure induces**
- 8 **oxidative stress and cell death in lateral line hair cells of zebrafish larvae.**
- 9 *Brain research* 2008, **1244**:1-12.
- 10 20. Hernández PP, Moreno V, Olivari FA, Allende ML: **Sub-lethal concentrations of**
- 11 **waterborne copper are toxic to lateral line neuromasts in zebrafish (*Danio***
- 12 **rerio).** *Hearing research* 2006, **213**(1-2):1-10.
- 13 21. Liang G-H, Järlebark L, Ulfendahl M, Moore EJ: **Mercury (Hg<sup>2+</sup>) suppression**
- 14 **of potassium currents of outer hair cells.** *Neurotoxicology and teratology* 2003,
- 15 **25**(3):349-359.
- 16 22. Harris JA, Cheng AG, Cunningham LL, MacDonald G, Raible DW, Rubel EW:
- 17 **Neomycin-induced hair cell death and rapid regeneration in the lateral line**
- 18 **of zebrafish (*Danio rerio*).** *Journal of the Association for Research in*
- 19 *Otolaryngology* 2003, **4**(2):219-234.
- 20 23. Dufourcq P, Roussigné M, Blader P, Rosa F, Peyrieras N, Vríz S: **Mechano-**
- 21 **sensory organ regeneration in adults: the zebrafish lateral line as a model.**
- 22 *Molecular and Cellular Neuroscience* 2006, **33**(2):180-187.
- 23 24. Wada H, Ghysen A, Asakawa K, Abe G, Ishitani T, Kawakami K: **Wnt/Dkk**
- 24 **negative feedback regulates sensory organ size in zebrafish.** *Current Biology*
- 25 2013, **23**(16):1559-1565.
- 26 25. Lyons DA, Pogoda H-M, Voas MG, Woods IG, Diamond B, Nix R, Arana N,
- 27 Jacobs J, Talbot WS: **erbb3 and erbb2 are essential for schwann cell migration**
- 28 **and myelination in zebrafish.** *Current Biology* 2005, **15**(6):513-524.
- 29 26. Lush ME, Piotrowski T: **ErbB expressing Schwann cells control lateral line**
- 30 **progenitor cells via non-cell-autonomous regulation of Wnt/ $\beta$ -catenin.** *Elife*
- 31 2014, **3**:e01832.
- 32 27. Perlin JR, Lush ME, Stephens WZ, Piotrowski T, Talbot WS: **Neuronal**
- 33 **Neuregulin 1 type III directs Schwann cell migration.** *Development* 2011,
- 34 **138**(21):4639-4648.
- 35 28. López-Schier H, Hudspeth A: **Supernumerary neuromasts in the posterior**
- 36 **lateral line of zebrafish lacking peripheral glia.** *Proceedings of the National*
- 37 *Academy of Sciences of the United States of America* 2005, **102**(5):1496-1501.
- 38 29. Nunez VA, Sarrazin AF, Cubedo N, Allende ML, Dambly-Chaudière C, Ghysen
- 39 A: **Postembryonic development of the posterior lateral line in the zebrafish.**
- 40 *Evolution & development* 2009, **11**(4):391-404.
- 41 30. Ledent V: **Postembryonic development of the posterior lateral line in**
- 42 **zebrafish.** *Development* 2002, **129**(3):597-604.
- 43 31. Sánchez M, Ceci ML, Gutiérrez D, Anguita-Salinas C, Allende ML:
- 44 **Mechanosensory organ regeneration in zebrafish depends on a population of**
- 45 **multipotent progenitor cells kept latent by Schwann cells.** *BMC biology* 2016,
- 46 **14**(1):1.

- 1 32. Steiner AB, Kim T, Cabot V, Hudspeth A: **Dynamic gene expression by putative**  
2 **hair-cell progenitors during regeneration in the zebrafish lateral line.**  
3 *Proceedings of the National Academy of Sciences* 2014, **111**(14):E1393-E1401.
- 4 33. Jiang L, Romero-Carvajal A, Haug JS, Seidel CW, Piotrowski T: **Gene-**  
5 **expression analysis of hair cell regeneration in the zebrafish lateral line.**  
6 *Proceedings of the National Academy of Sciences* 2014, **111**(14):E1383-E1392.
- 7 34. Keightley M-C, Wang C-H, Pazhakh V, Lieschke GJ: **Delineating the roles of**  
8 **neutrophils and macrophages in zebrafish regeneration models.** *The*  
9 *international journal of biochemistry & cell biology* 2014, **56**:92-106.
- 10 35. Stefater III JA, Ren S, Lang RA, Duffield JS: **Metchnikoff's policemen:**  
11 **macrophages in development, homeostasis and regeneration.** *Trends in*  
12 *molecular medicine* 2011, **17**(12):743-752.
- 13 36. Nguyen-Chi M, Laplace-Builhe B, Travnickova J, Luz-Crawford P, Tejedor G,  
14 Phan QT, Duroux-Richard I, Levraud J-P, Kissa K, Lutfalla G: **Identification of**  
15 **polarized macrophage subsets in zebrafish.** *Elife* 2015, **4**:e07288.
- 16 37. Sica A, Mantovani A: **Macrophage plasticity and polarization: in vivo veritas.**  
17 *The Journal of clinical investigation* 2012, **122**(3):787-795.
- 18 38. Martin CJ, Peters KN, Behar SM: **Macrophages clean up: efferocytosis and**  
19 **microbial control.** *Current opinion in microbiology* 2014, **17**:17-23.
- 20 39. Wynn TA, Vannella KM: **Macrophages in tissue repair, regeneration, and**  
21 **fibrosis.** *Immunity* 2016, **44**(3):450-462.
- 22 40. Chazaud B: **Macrophages: supportive cells for tissue repair and regeneration.**  
23 *Immunobiology* 2014, **219**(3):172-178.
- 24 41. Nguyen-Chi M, Laplace-Builhé B, Travnickova J, Luz-Crawford P, Tejedor G,  
25 Lutfalla G, Kissa K, Jorgensen C, Djouad F: **TNF signaling and macrophages**  
26 **govern fin regeneration in zebrafish larvae.** *Cell Death and Disease* 2017, **8**(8).
- 27 42. Gurevich DB, Severn CE, Twomey C, Greenhough A, Cash J, Toye AM, Mellor  
28 H, Martin P: **Live imaging of wound angiogenesis reveals macrophage**  
29 **orchestrated vessel sprouting and regression.** *The EMBO journal* 2018,  
30 **37**(13):e97786.
- 31 43. Cattin A-L, Burden JJ, Van Emmenis L, Mackenzie FE, Hoving JJ, Calavia NG,  
32 Guo Y, McLaughlin M, Rosenberg LH, Quereda V: **Macrophage-induced blood**  
33 **vessels guide Schwann cell-mediated regeneration of peripheral nerves.** *Cell*  
34 2015, **162**(5):1127-1139.
- 35 44. Fantin A, Vieira JM, Gestri G, Denti L, Schwarz Q, Prykhodzhiy S, Peri F, Wilson  
36 SW, Ruhrberg C: **Tissue macrophages act as cellular chaperones for vascular**  
37 **anastomosis downstream of VEGF-mediated endothelial tip cell induction.**  
38 *Blood* 2010:1009-2012-257832.
- 39 45. Lin S-L, Li B, Rao S, Yeo E-J, Hudson TE, Nowlin BT, Pei H, Chen L, Zheng JJ,  
40 Carroll TJ: **Macrophage Wnt7b is critical for kidney repair and regeneration.**  
41 *Proceedings of the National Academy of Sciences* 2010, **107**(9):4194-4199.
- 42 46. Stefater III JA, Lewkowich I, Rao S, Mariggi G, Carpenter AC, Burr AR, Fan J,  
43 Ajima R, Molkentin JD, Williams BO: **Regulation of angiogenesis by a non-**  
44 **canonical Wnt-Flt1 pathway in myeloid cells.** *Nature* 2011, **474**(7352):511.
- 45 47. Liu C, Wu C, Yang Q, Gao J, Li L, Yang D, Luo L: **Macrophages mediate the**  
46 **repair of brain vascular rupture through direct physical adhesion and**



- 1        **mechanical traction. *Immunity* 2016, 44(5):1162-1176.**
- 2    48. Carrillo SA, Anguita-Salinas C, Peña OA, Morales RA, Muñoz-Sánchez S,
- 3        Muñoz-Montecinos C, Paredes-Zúñiga S, Tapia K, Allende ML: **Macrophage**
- 4        **recruitment contributes to regeneration of mechanosensory hair cells in the**
- 5        **zebrafish lateral line. *Journal of cellular biochemistry* 2016.**
- 6    49. Haas P, Gilmour D: **Chemokine signaling mediates self-organizing tissue**
- 7        **migration in the zebrafish lateral line. *Developmental cell* 2006, 10(5):673-680.**
- 8    50. Gilmour DT, Maischein H-M, Nüsslein-Volhard C: **Migration and function of a**
- 9        **glial subtype in the vertebrate peripheral nervous system. *Neuron* 2002,**
- 10       **34(4):577-588.**
- 11   51. Ellett F, Pase L, Hayman JW, Andrianopoulos A, Lieschke GJ: **mpeg1 promoter**
- 12       **transgenes direct macrophage-lineage expression in zebrafish. *Blood* 2011,**
- 13       **117(4):e49-e56.**
- 14   52. Renshaw SA, Loynes CA, Trushell DM, Elworthy S, Ingham PW, Whyte MK: **A**
- 15       **transgenic zebrafish model of neutrophilic inflammation. *Blood* 2006,**
- 16       **108(13):3976-3978.**
- 17   53. Shimizu N, Kawakami K, Ishitani T: **Visualization and exploration of Tcf/Lef**
- 18       **function using a highly responsive Wnt/β-catenin signaling-reporter**
- 19       **transgenic zebrafish. *Developmental biology* 2012, 370(1):71-85.**
- 20   54. Kwan KM, Fujimoto E, Grabher C, Mangum BD, Hardy ME, Campbell DS,
- 21       Parant JM, Yost HJ, Kanki JP, Chien CB: **The Tol2kit: a multisite gateway-**
- 22       **based construction kit for Tol2 transposon transgenesis constructs.**
- 23       *Developmental dynamics: an official publication of the American Association of*
- 24       *Anatomists* 2007, **236(11):3088-3099.**
- 25   55. Nagayoshi S, Hayashi E, Abe G, Osato N, Asakawa K, Urasaki A, Horikawa K,
- 26       Ikeo K, Takeda H, Kawakami K: **Insertional mutagenesis by the Tol2**
- 27       **transposon-mediated enhancer trap approach generated mutations in two**
- 28       **developmental genes: tcf7 and synembryn-like. *Development* 2008,**
- 29       **135(1):159-169.**
- 30   56. Chen C-F, Chu C-Y, Chen T-H, Lee S-J, Shen C-N, Hsiao C-D: **Establishment of**
- 31       **a transgenic zebrafish line for superficial skin ablation and functional**
- 32       **validation of apoptosis modulators in vivo. *PLoS One* 2011, 6(5):e20654.**
- 33   57. Kimmel CB, Ballard WW, Kimmel SR, Ullmann B, Schilling TF: **Stages of**
- 34       **embryonic development of the zebrafish. *Developmental dynamics* 1995,**
- 35       **203(3):253-310.**
- 36   58. Thisse C, Thisse B: **High-resolution in situ hybridization to whole-mount**
- 37       **zebrafish embryos. *Nature protocols* 2008, 3(1):59.**
- 38   59. Inoue D, Wittbrodt J: **One for all—a highly efficient and versatile method for**
- 39       **fluorescent immunostaining in fish embryos. *PloS one* 2011, 6(5):e19713.**
- 40   60. Schindelin J, Arganda-Carreras I, Frise E, Kaynig V, Longair M, Pietzsch T,
- 41       Preibisch S, Rueden C, Saalfeld S, Schmid B: **Fiji: an open-source platform for**
- 42       **biological-image analysis. *Nature methods* 2012, 9(7):676.**
- 43   61. Tinevez J-Y, Perry N, Schindelin J, Hoopes GM, Reynolds GD, Laplantine E,
- 44       Bednarek SY, Shorte SL, Eliceiri KW: **TrackMate: An open and extensible**
- 45       **platform for single-particle tracking. *Methods* 2017, 115:80-90.**
- 46   62. Benard EL, van der Sar AM, Ellett F, Lieschke GJ, Spaink HP, Meijer AH:

- 1        **Infection of zebrafish embryos with intracellular bacterial pathogens.** *Journal*  
2        *of visualized experiments: JoVE* 2012(61).
- 3        63.        Lecaudey V, Cakan-Akdogan G, Norton WH, Gilmour D: **Dynamic Fgf signaling**  
4        **couples morphogenesis and migration in the zebrafish lateral line**  
5        **primordium.** *Development* 2008, **135**(16):2695-2705.
- 6        64.        Power RM, Huisken J: **A guide to light-sheet fluorescence microscopy for**  
7        **multiscale imaging.** *Nature methods* 2017, **14**(4):360.
- 8        65.        Kniss JS, Jiang L, Piotrowski T: **Insights into sensory hair cell regeneration**  
9        **from the zebrafish lateral line.** *Current opinion in genetics & development*  
10        2016, **40**:32-40.
- 11        66.        Jarrom D, Jaberipour M, Guise CP, Daff S, White SA, Searle PF, Hyde EI:  
12        **Steady-state and stopped-flow kinetic studies of three Escherichia coli NfsB**  
13        **mutants with enhanced activity for the prodrug CB1954.** *Biochemistry* 2009,  
14        **48**(32):7665-7672.
- 15        67.        Tsutsui H, Karasawa S, Shimizu H, Nukina N, Miyawaki A: **Semi-rational**  
16        **engineering of a coral fluorescent protein into an efficient highlighter.** *EMBO*  
17        *reports* 2005, **6**(3):233-238.
- 18        68.        Graciarena M, Dambly-Chaudière C, Ghysen A: **Dynamics of axonal**  
19        **regeneration in adult and aging zebrafish reveal the promoting effect of a**  
20        **first lesion.** *Proceedings of the National Academy of Sciences* 2014, **111**(4):1610-  
21        1615.
- 22        69.        Osheroov N, Levitzki A: **Epidermal-Growth-Factor-Dependent Activation of**  
23        **the Src-Family Kinases.** *The FEBS Journal* 1994, **225**(3):1047-1053.
- 24        70.        d'Alençon CA, Peña OA, Wittmann C, Gallardo VE, Jones RA, Loosli F, Liebel  
25        U, Grabher C, Allende ML: **A high-throughput chemically induced**  
26        **inflammation assay in zebrafish.** *BMC biology* 2010, **8**(1):1.
- 27        71.        van Rooijen N, Hendrikx E: **Liposomes for specific depletion of macrophages**  
28        **from organs and tissues.** In: *Liposomes*. Springer; 2010: 189-203.
- 29        72.        Zhang J, Yang Y, Yang Z, Li T, Chen F: **Snapshot: Targeting Macrophages as a**  
30        **Candidate for Tissue Regeneration.** *Current issues in molecular biology* 2018,  
31        **29**:37-48.
- 32        73.        El-Ghoneimi A, Cursio R, Schmid-Alliana A, Tovey M, Lasfar A, Michiels J-F,  
33        Rossi B, Gugenheim J: **Inhibition of tumor necrosis factor alpha gene**  
34        **transcription by pentoxifylline reduces normothermic liver ischemia-**  
35        **reperfusion injury in rats.** In: *Transplantation proceedings: 2007*. Elsevier:  
36        1761-1764.
- 37        74.        Doherty G, Jensen JC, Alexander H, Buresh C, Norton J: **Pentoxifylline**  
38        **suppression of tumor necrosis factor gene transcription.** *Surgery* 1991,  
39        **110**(2):192-198.
- 40        75.        Schmidt-Choudhury A, Furuta GT, Lavigne JA, Galli SJ, Wershil BK: **The**  
41        **regulation of tumor necrosis factor- $\alpha$  production in murine mast cells:**  
42        **pentoxifylline or dexamethasone inhibits IgE-dependent production of TNF-**  
43         **$\alpha$  by distinct mechanisms.** *Cellular immunology* 1996, **171**(1):140-146.
- 44        76.        Hong S-S, Choi JH, Lee SY, Park Y-H, Park K-Y, Lee JY, Kim J, Gajulapati V,  
45        Goo J-I, Singh S: **A novel small-molecule inhibitor targeting the IL-6 receptor**  
46         **$\beta$  subunit, glycoprotein 130.** *The Journal of Immunology* 2015:1402908.

- 1 77. Chen B, Dodge ME, Tang W, Lu J, Ma Z, Fan C-W, Wei S, Hao W, Kilgore J,  
2 Williams NS: **Small molecule-mediated disruption of Wnt-dependent**  
3 **signaling in tissue regeneration and cancer.** *Nature chemical biology* 2009,  
4 **5(2):100-107.**
- 5 78. Moya-Díaz J, Peña OA, Sánchez M, Ureta DA, Reynaert NG, Anguita-Salinas C,  
6 Marín G, Allende ML: **Electroablation: a method for neurectomy and**  
7 **localized tissue injury.** *BMC developmental biology* 2014, **14(1):1.**
- 8 79. Rojas-Muñoz A, Rajadhyksha S, Gilmour D, van Bebber F, Antos C, Esteban CR,  
9 Nüsslein-Volhard C, Belmonte JCI: **ErbB2 and ErbB3 regulate amputation-**  
10 **induced proliferation and migration during vertebrate regeneration.**  
11 *Developmental biology* 2009, **327(1):177-190.**
- 12 80. Loynes CA, Martin JS, Robertson A, Trushell DM, Ingham PW, Whyte MK,  
13 Renshaw SA: **Pivotal Advance: Pharmacological manipulation of**  
14 **inflammation resolution during spontaneously resolving tissue neutrophilia**  
15 **in the zebrafish.** *Journal of leukocyte biology* 2010, **87(2):203-212.**
- 16 81. Li L, Yan B, Shi Y-Q, Zhang W-Q, Wen Z-L: **Live imaging reveals differing**  
17 **roles of macrophages and neutrophils during zebrafish tail fin regeneration.**  
18 *Journal of Biological Chemistry* 2012:jbc. M112. 349126.
- 19 82. Kolaczowska E, Kubes P: **Neutrophil recruitment and function in health and**  
20 **inflammation.** *Nature reviews immunology* 2013, **13(3):159.**
- 21 83. Tsarouchas TM, Wehner D, Cavone L, Munir T, Keatinge M, Lambertus M,  
22 Underhill A, Barrett T, Kassapis E, Ogryzko N: **Dynamic control of**  
23 **proinflammatory cytokines Il-1 $\beta$  and Tnf- $\alpha$  by macrophages in zebrafish**  
24 **spinal cord regeneration.** *Nature communications* 2018, **9(1):4670.**
- 25 84. Hasegawa T, Hall CJ, Crosier PS, Abe G, Kawakami K, Kudo A, Kawakami A:  
26 **Transient inflammatory response mediated by interleukin-1 $\beta$  is required for**  
27 **proper regeneration in zebrafish fin fold.** *Elife* 2017, **6:e22716.**
- 28 85. Saclier M, Yacoub-Youssef H, Mackey AL, Arnold L, Ardjoune H, Magnan M,  
29 Sailhan F, Chelly J, Pavlath GK, Mounier R: **Differentially activated**  
30 **macrophages orchestrate myogenic precursor cell fate during human skeletal**  
31 **muscle regeneration.** *Stem cells* 2013, **31(2):384-396.**
- 32 86. Arnold L, Henry A, Poron F, Baba-Amer Y, Van Rooijen N, Plonquet A, Gherardi  
33 RK, Chazaud B: **Inflammatory monocytes recruited after skeletal muscle**  
34 **injury switch into antiinflammatory macrophages to support myogenesis.**  
35 *Journal of Experimental Medicine* 2007, **204(5):1057-1069.**
- 36 87. Saclier M, Cuvellier S, Magnan M, Mounier R, Chazaud B:  
37 **Monocyte/macrophage interactions with myogenic precursor cells during**  
38 **skeletal muscle regeneration.** *The FEBS journal* 2013, **280(17):4118-4130.**
- 39 88. White DT, Sengupta S, Saxena MT, Xu Q, Hanes J, Ding D, Ji H, Mumm JS:  
40 **Immunomodulation-accelerated neuronal regeneration following selective**  
41 **rod photoreceptor cell ablation in the zebrafish retina.** *Proceedings of the*  
42 *National Academy of Sciences* 2017, **114(18):E3719-E3728.**
- 43 89. Morales RA, Allende ML: **Peripheral Macrophages Promote Tissue**  
44 **Regeneration in Zebrafish by Fine-tuning the Inflammatory Response.**  
45 *Frontiers in Immunology* 2019, **10:253.**
- 46 90. Röszer T: **Understanding the mysterious M2 macrophage through activation**



- 1        **markers and effector mechanisms. *Mediators of inflammation* 2015, 2015.**
- 2    91.    Jenkins MH, Alrowaished SS, Goody MF, Crawford BD, Henry CA: **Laminin**
- 3        **and Matrix metalloproteinase 11 regulate Fibronectin levels in the zebrafish**
- 4        **myotendinous junction. *Skeletal muscle* 2016, 6(1):18.**
- 5    92.    Xu S, Webb SE, Lau TCK, Cheng SH: **Matrix metalloproteinases (MMPs)**
- 6        **mediate leukocyte recruitment during the inflammatory phase of zebrafish**
- 7        **heart regeneration. *Scientific reports* 2018, 8(1):7199.**
- 8    93.    Wynn TA, Chawla A, Pollard JW: **Macrophage biology in development,**
- 9        **homeostasis and disease. *Nature* 2013, 496(7446):445.**
- 10

## Figure 1

bioRxiv preprint doi: <https://doi.org/10.1101/2021.12.29.474498>; this version posted December 30, 2021. The copyright holder for this preprint (which was not certified by peer review) is the author/funder. All rights reserved. No reuse allowed without permission.

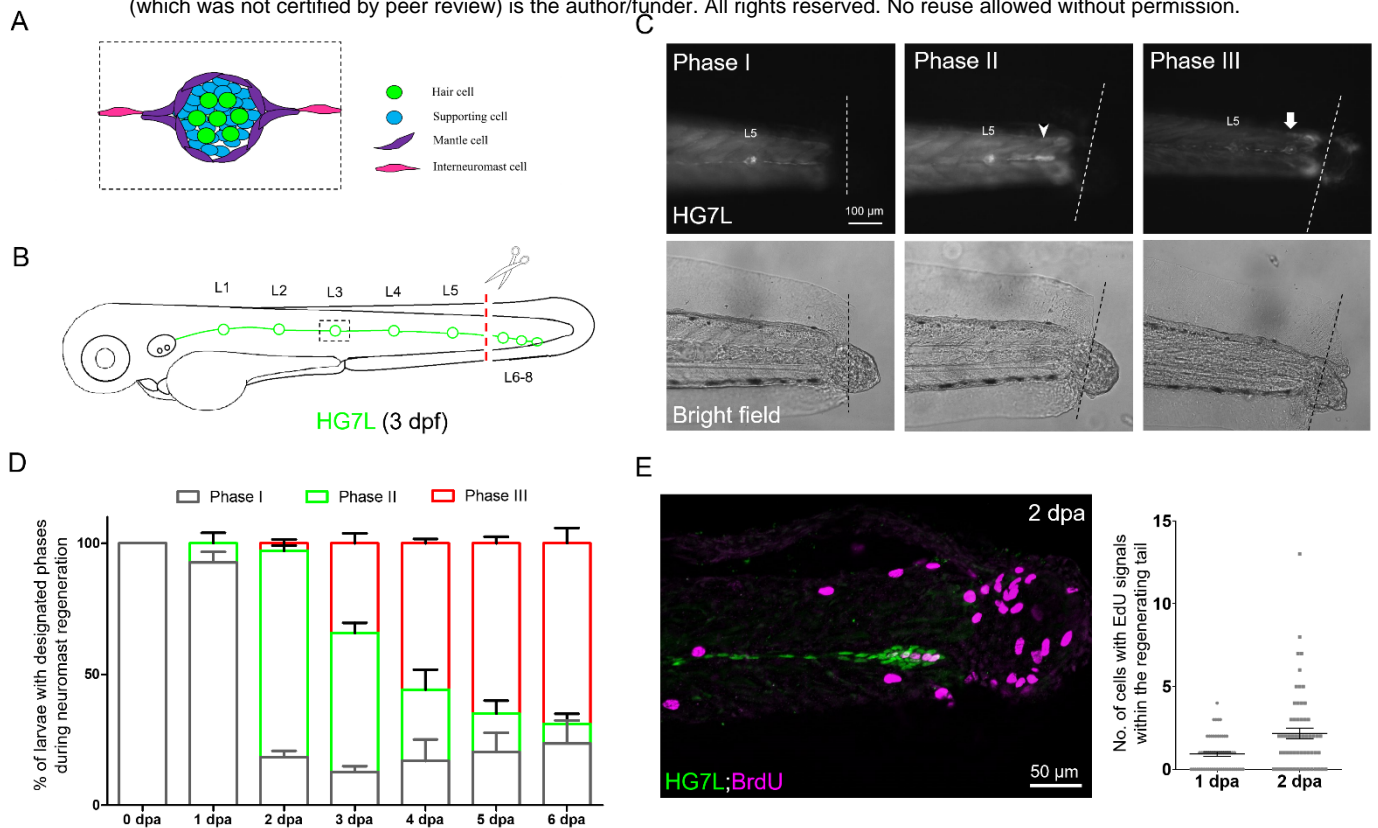

**Figure 1.** Active cell proliferation and clustering occur during neuromast regeneration upon fin amputation. (A) A cartoon shows different cell types in a neuromast of lateral line. (B) A cartoon shows one side of the fluorescent posterior lateral (in green) with L1-8 neuromasts of a *Et(HG7L)* larva at 3 days post fertilization and the tail fin is clipped at the dashed line to remove neuromast L6-8. (C) A new neuromast was regenerated in three distinct phases as examined at GFP channel under epifluorescent microscopy. Phase I: No notable increase in fluorescent cells were observed in the lateral line between the L5 neuromast (as labeled) and the cut site (dotted line). Phase II: Fluorescent cells were increased and aggregated to form a cluster (arrowhead). Phase III: A new neuromast was formed (arrow). The corresponding bright field images for each phase are shown below. (D) The percentages of larvae at each phase were calculated at designated day post amputation (dpa, N = 3, n = 70). (E) HG7L larvae were fin-amputated, fixed at 1 and 2 dpa and subjected BrdU staining (in magenta) to probe actively proliferating cells or GFP immunohistochemistry (in green) to stain lateral line. Active cell proliferation was observed near the cutting edge at 2 dpa and quantified as shown in a scatter plot on the right.

**Figure 2**

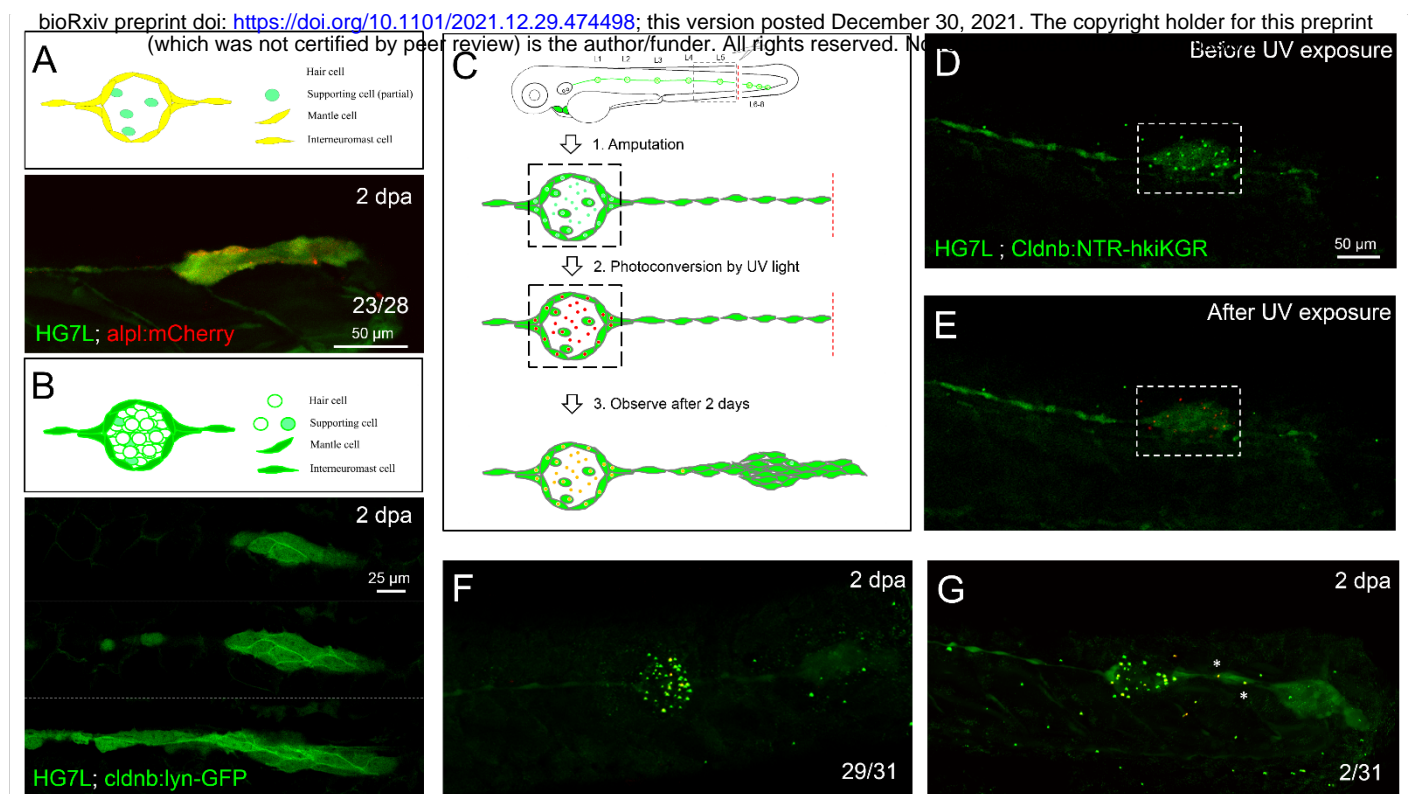

**Figure 2.** *Interneuromast cells are the origin of clustering cells post fin amputation.* We performed fin amputation on double transgenic larvae from the cross of the *Et(HG7L)* with the *Tg(-4.7alpl:mCherry)* (*alpl:mCherry*) or *Tg(-8.0cldnb:lyn-GFP)* (*cldnb:lynGFP*) to track the origin of progenitor cells for the regenerating cluster post fin amputation at two days after amputation (2 dpa). (A) The regenerating cluster of fin amputated-larvae of *Et(HG7L)XTg(-4.7alpl:mCherry)* lines was examined at GFP or mCherry channel and photographed under confocal microscopy. A representative superimposed image from both channels is shown. The regenerating cluster image contains mostly yellow signal. As illustrated in a cartoon above, the clustering cells could be originated from both interneuromast cells (INCs) and mantle cells (MCs). (B) The regenerating cluster of fin amputated-larvae of *Et(HG7L) X Tg(-8.0cldnb:lyn-GFP)* was examined at GFP channel to scan the z-axis. Images at three different z positions clearly show the existence of both membrane and cytosol green fluorescence. As illustrated in a cartoon above, the signals could be originated from INCs, MCs and supporting cells. (C) A series of cartoons show the scheme of utilizing a *Tg(-8.0cldnb:NTR-hKikGR; myl7:EGFP)* transgenic line, which expresses nitroreductase (NTR) and hKikGR fusion protein, to further discern whether the clustering cells are from INCs or cells inside a neuromast. To label the lateral line, we used larvae from the cross of *Et(HG7L)* (green) and *Tg(-8.0cldnb:NTR-hKikGR; myl7:EGFP)* (green dots), examined and photographed at GFP channel before (D) and after UV exposure (E). After UV exposure, the green *hKikGR* dots were converted to red, in all cell types including MCs within distal neuromast right after fin amputation. (F) At 2 dpa, labeled cells generated new green hKikGR protein. The mingling of green and red signals become yellow as shown in (F). The labeled cells within the neuromasts rarely escaped in most treated larvae (29/31). However, we observed that a few larvae (2/31) showed yellow signal in the neighboring of INCs (white asterisks) as shown in (G).

### Figure 3

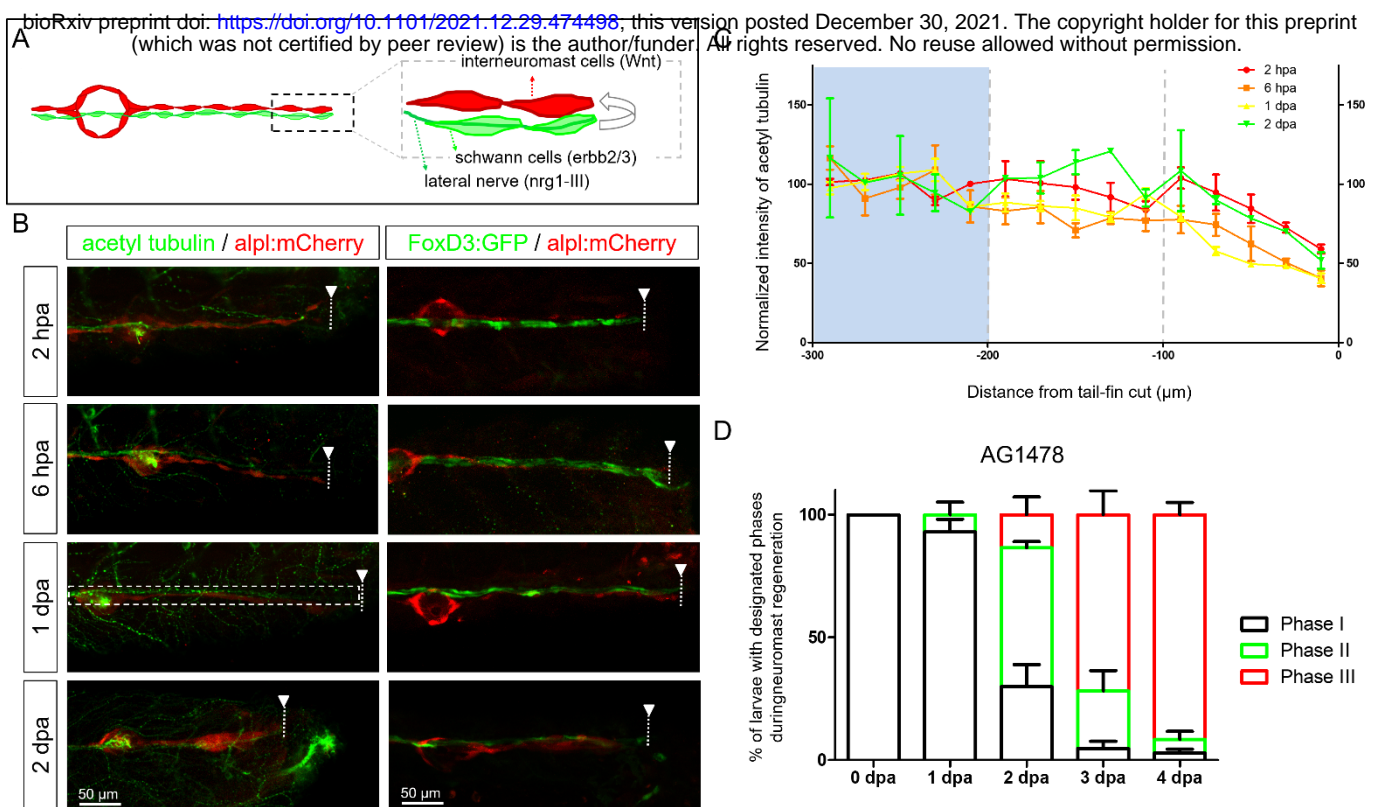

**Figure 3.** Diminished nerve inhibition near the cut site may allow neuromast regeneration from interneuromast cells. (A) A cartoon shows the close contact between interneuromast cells (INC, red) with underlying Schwann cells (SWCs, light green) and posterior lateral nerve (pLLn, dark green). The pLLn-derived *nrg1-III* can activate *erb2/3* receptors on SWCs to suppress Wnt activity in INCs, thus keeps INCs in a quiescent state. (B) The *Et(HG7L)* larvae at 3 day post fertilization (dpf) were treated with 3  $\mu$ M of AG1478, fin amputated to examine neuromast regeneration according to Fig. 1C. (C) The 3-dpf larvae from the cross of *Tg(-4.7alpl:mCherry)* and *Tg(foxd3:EGFP)* were tail fin amputated and immobilized at designated time to show the integrity of SWCs in green (labeled by *Tg(FoxD3:GFP)*) in all stages examined (right column). *Tg(-4.7alpl:mCherry)* larvae with red fluorescent lateral line at 3 dpf were also tail fin-amputated, fixed at designated hours or days post amputation (hpa or dpa, respectively) and subjected to immunostaining against acetyl tubulin to reveal green nerves along the red lateral line (left column). It appeared that the fluorescent intensity of green pLLn is diminishing approaching the cut site (dashed line). So, we measured the green fluorescent intensity at decreasing distance from the cut site in cropped images as depicted by a dotted rectangle as shown in the image of 1-dpa larva. The averaged intensity was calculated and normalized with those of the proximal region (200-300  $\mu$ m from cutting edge, blue background) for designated times shown by different colors (D). Data is presented as mean  $\pm$  s.e.m..

## Figure 4

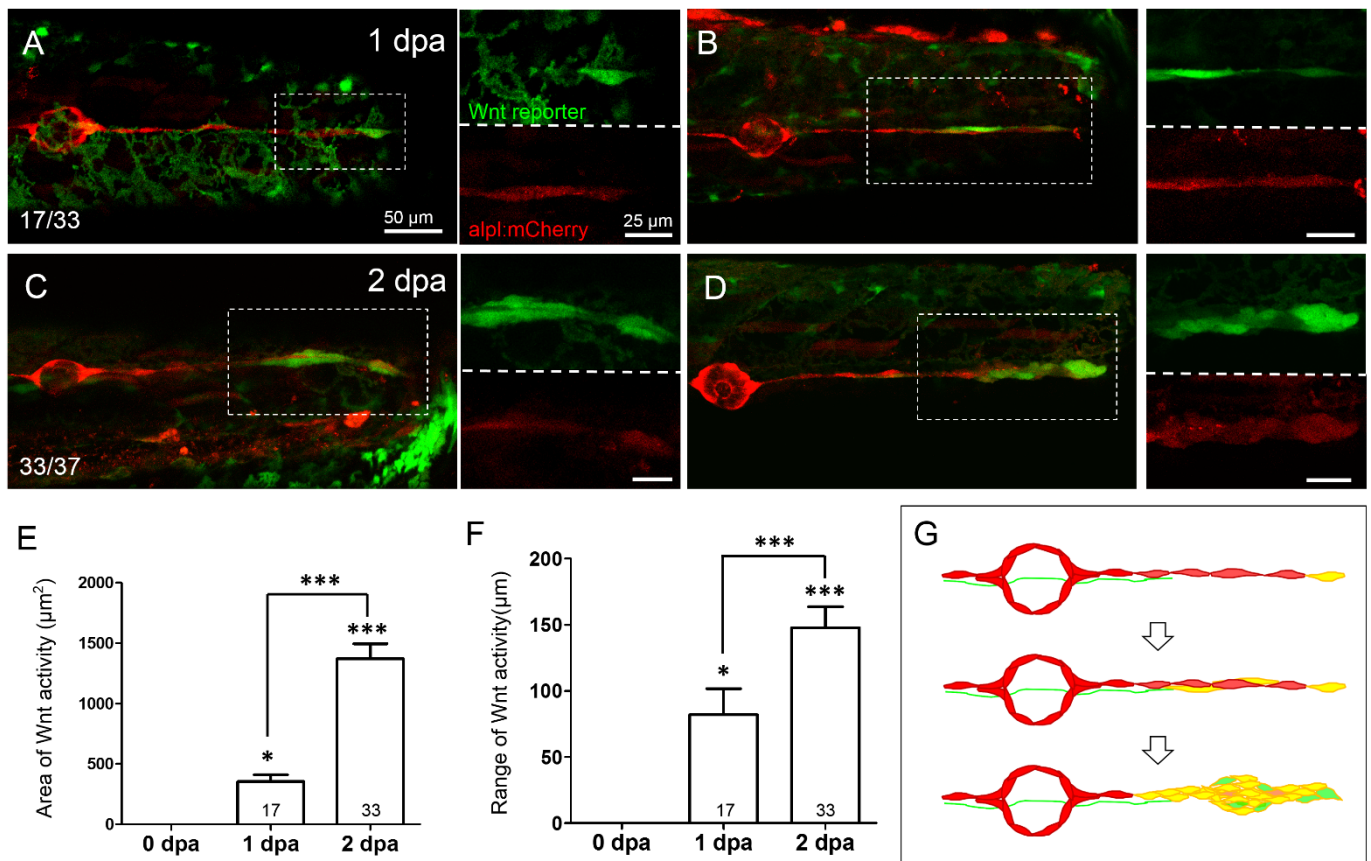

**Figure 4.** *Wnt* activity is enhanced in the lateral line near the injured site at 1-2-day post amputation. Representative superimposed stacked images of two different larvae (A,C and B,D) from the cross of *Tg(6XTcf/LefBS-miniP:d2GFP)* (green), and *Tg(-4.7alpl:mCherry)* (red) at one day post amputation (dpa, A,B) and 2 dpa (C,D) are shown. Elevated green Wnt activity was observed in and surrounding lateral line as shown in (A). Interneuromast cells (arrows) near the wound site showed yellow signal due to the superimposed color for red lateral line and green Wnt signal. Magnified diagrams for each dashed-rectangle are shown next to the corresponding superimposed photo at green or red channel. Scales are the same for all superimposed images as shown in (A). Scale bars are 25  $\mu$ m in magnified images. (E-F) The areas and range of Wnt activity, defined by measuring the extension from tail-cut to the most proximal end, were calculated and shown. Data represents mean  $\pm$  s.e.m. and analyzed by one-way ANOVA comparing to that of 0 dpa. In addition, the difference between 1 and 2 dpa were analyzed and shown. \* $P < 0.05$ , \*\*\* $P < 0.0005$ . (G) A series of cartoons illustrate the elevation of Wnt activity (yellow) during cluster formation.



**Figure 5**

bioRxiv preprint doi: <https://doi.org/10.1101/2021.12.29.474498>; this version posted December 30, 2021. The copyright holder for this preprint (which was not certified by peer review) is the author/funder, who has granted bioRxiv a license to display the preprint in perpetuity. It is made available under aCC-BY-NC-ND 4.0 International license.

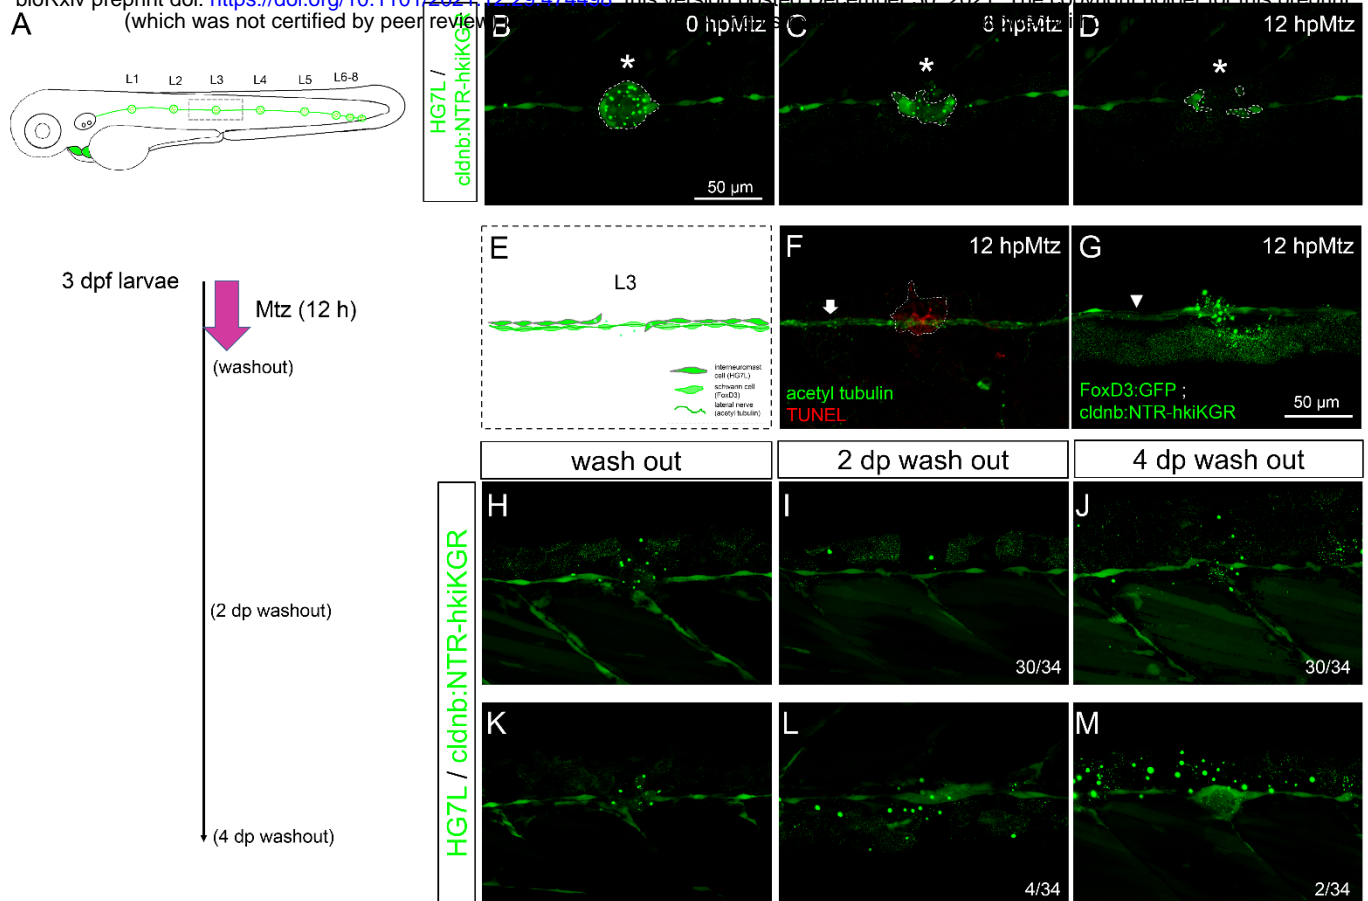

**Figure 5.** Chemical-genetic ablation of neuromasts blocks neuromast regeneration in most but not all larvae. (A) Larvae from the cross of *Et(HG7L)* (green) and *Tg(-8.0cldnb:NTR-hkiKGR)* (green dots) were treated with 2 mM metronidazole (Mtz) at 3 days post fertilization (dpf) for 12 h, washed out, cultured, examined and photographed at designated h post Mtz treatment (hpMtz) as shown in a series of cartoons. (B-D) Representative stacked images show decreasing size (enclosed by dashed lines) of neuromast (asterisks) during Mtz treatment. (E) A cartoon shows the absence of neuromast with undamaged Schwann cells and lateral nerve. (F) Apoptotic cells were clearly labeled by the TUNEL staining in the Mtz-treated larva and the lateral nerve (arrow) stayed undamaged. (G) Mtz was used to treat larvae from the cross of *Tg(foxD3:GFP)* and *Tg(-8.0cldnb:NTR-hkiKGR)*. It appeared that Schwann cells (arrowhead pointed green rod) appeared intact in compared to the disintegrating neuromast (asterisk) in a representative stacked image. The faint broad green signal underneath is stacked signals from underlying tissues. (H-J) After washing out Mtz, most of interneuromast cells (30/34) in the proximity of ablated neuromasts did not form a new neuromast. (K-M) A few (2/34) larvae had regenerated a neuromast (M) through cluster formation (4/34) (L). Scale bars are the same in all panels but only shown in (B).

## Figure 6

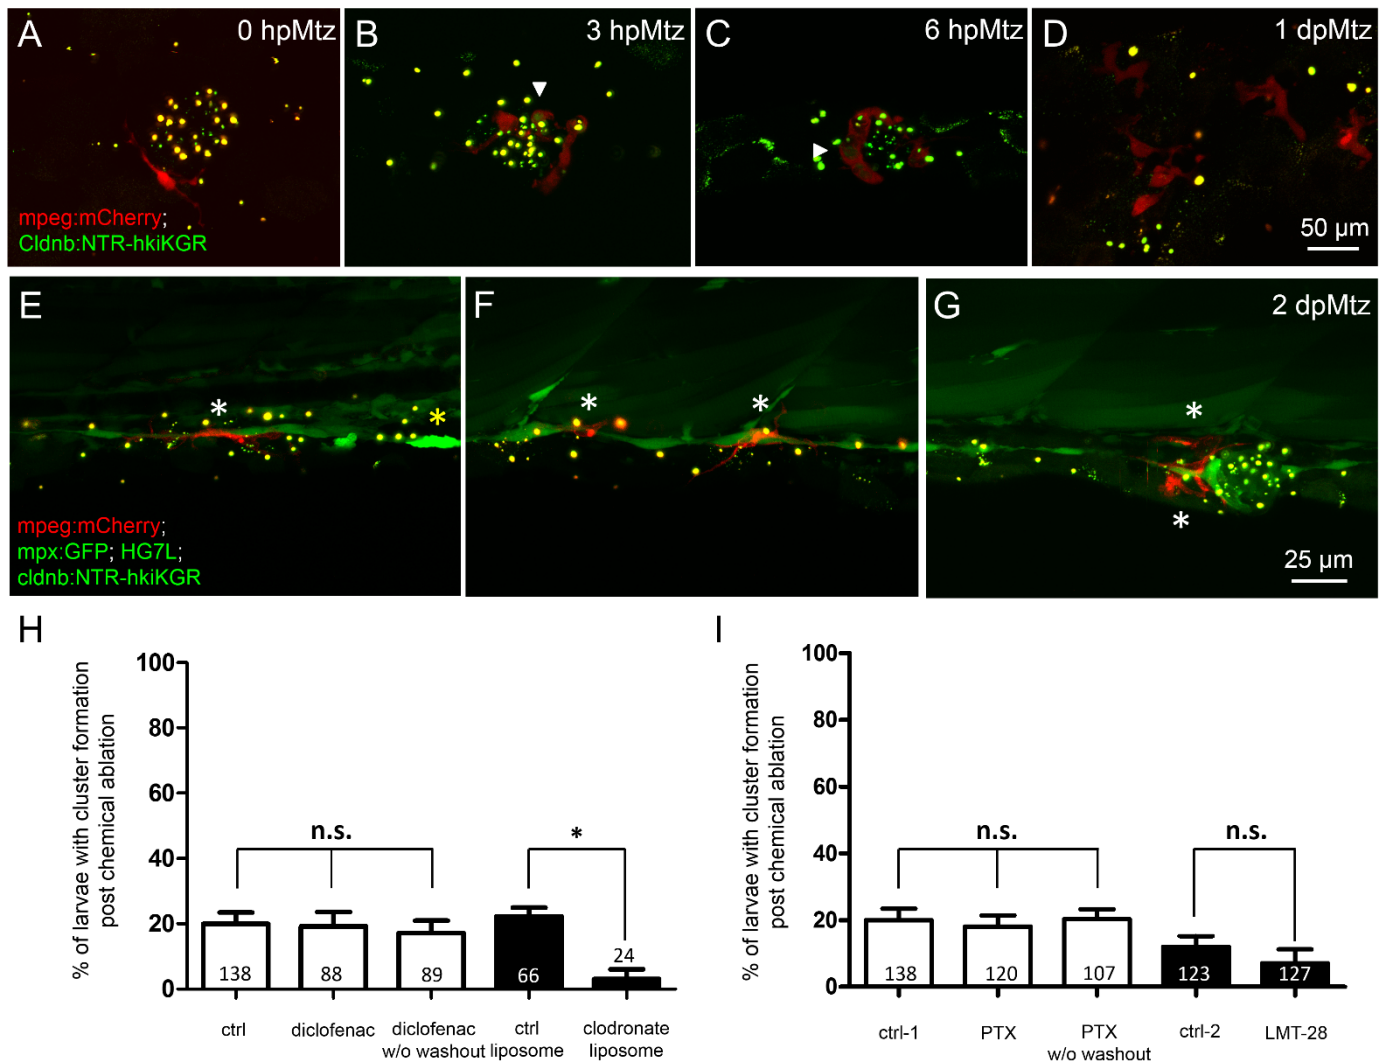

**Figure 6.** Changes in phagocytes surrounding deteriorating neuromasts and their effects on cluster formation. Larvae from the cross of *Tg(mpeg:mcherry)* (red) and *Tg(-8.0cldnb:NTR-hkiKGR;myl7:EGFP)* (green) were treated with metrodinazole (Mtz) as described in Fig. 5, examined and photographed at designated hours or days post Mtz treatment (hpMtz or dpMtz). We observed the disintegration of neuromasts post Mtz treatment (A-D). Red macrophages (arrowheads) were recruited to engulf injured neuromasts in a dendritic cell-like shape within hours post Mtz treatment (A-C). The injured neuromast was disappeared, but macrophages were still retained in the injured site at 1dpMtz. Please note that the macrophages became more compact round shape with protrusions (D). (E-G) Triple-transgenic larvae as designated were treated as described above, examined and photographed at 2 dpMz. Macrophages (red, white asterisks) were still found in the posterior lateral line system, even in the presence of a new neuromast as shown in (G). In contrast, only a few neutrophils (bright green, yellow asterisks) were found. Scales are the same for each row, but only shown in the far-right panel. (H) Larvae from the cross of *Et(HG7L)* and *Tg(-8.0cldnb:NTR-hKikGR;myl7:EGFP)* were treated without (ctrl) and with 3  $\mu$ M diclofenac (with or without washout), control or clodronate liposome (H), or treated with different cytokine inhibitors PTX (35  $\mu$ M) or LMT-28 (10  $\mu$ M) (I). The above treated larvae were undergone a 12-h Mtz treatment and scored for the % of larvae with cluster formation. Data represents mean  $\pm$  s.e.m. and analyzed by one-way ANOVA, \* $P$  < 0.05. n.s.: not significant.

## Figure 7

bioRxiv preprint doi: <https://doi.org/10.1101/2021.12.29.474498>; this version posted December 30, 2021. The copyright holder for this preprint (which was not certified by peer review) is the author/funder. All rights reserved. No reuse allowed without permission.

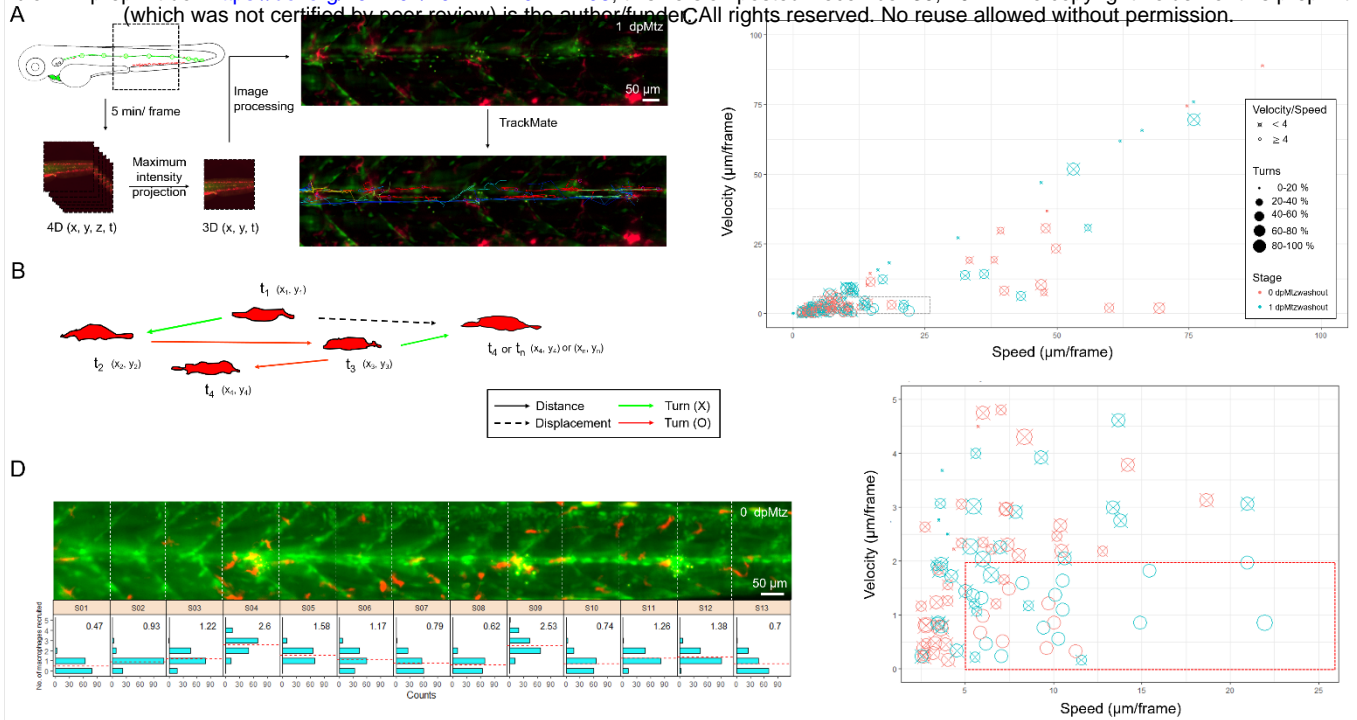

**Figure 7.** *In toto* imaging analysis reveals differential cell behaviors and specific spatial distribution of macrophages during neuromast regeneration. (A) As shown in the flowchart, the trunk region including neuromast L3-5 were imaged *in toto* by light-sheet fluorescence microscopy (LSFM) to monitor macrophage behavior during neuromast regeneration. Larvae from the cross of *Tg(mpeg1:mCherry; FoxD3:GFP)* and *Tg(-8.0cldnb:NTR-hKikGR); Et(HG7L)*, a wide field of z-stack images focusing around the cloaca (dashed rectangle) was taken every 5 min. We then reduced the order to 3D (x,y,t) with stacking of z sections and processed to have a better resolution by subtracting background. Finally, we used the plugin “TrackMate” in the Fiji software and manually modified to acquire the tracking path of every macrophages (shown in right-bottom corner). (B) Distance (arrows) and displacement (arrows with dashed line) were measured to calculate speed and velocity as shown in (C). Turns were counted among cell movements (indicated by red) to generate the ratio of turns in (C). (C) A scatter plot shows specific speed (the X-axis) and velocity (the Y-axis) for each macrophage. Other features such as “Speed / Velocity”, “Ratio of turns” and “Stage” are also depicted as shown in the legends on the right to better distinguish different cell behaviors. A region with a speed lower than 25 and velocity smaller than 10 (dashed rectangle) was magnified as shown in the lower panel. (D) Histograms divided by sections (width of 100 μm) represent counts (the X-axis) of different number of recruited macrophages (the Y-axis) during neuromast regeneration. In each panel, the mean of “number of recruited macrophages” is shown in right-upper panel and presented with dashed lines in red.



## Figure 8

bioRxiv preprint doi: <https://doi.org/10.1101/2021.12.29.474498>; this version posted December 30, 2021. The copyright holder for this preprint (which was not certified by peer review) is the author/funder. All rights reserved. No reuse allowed without permission.

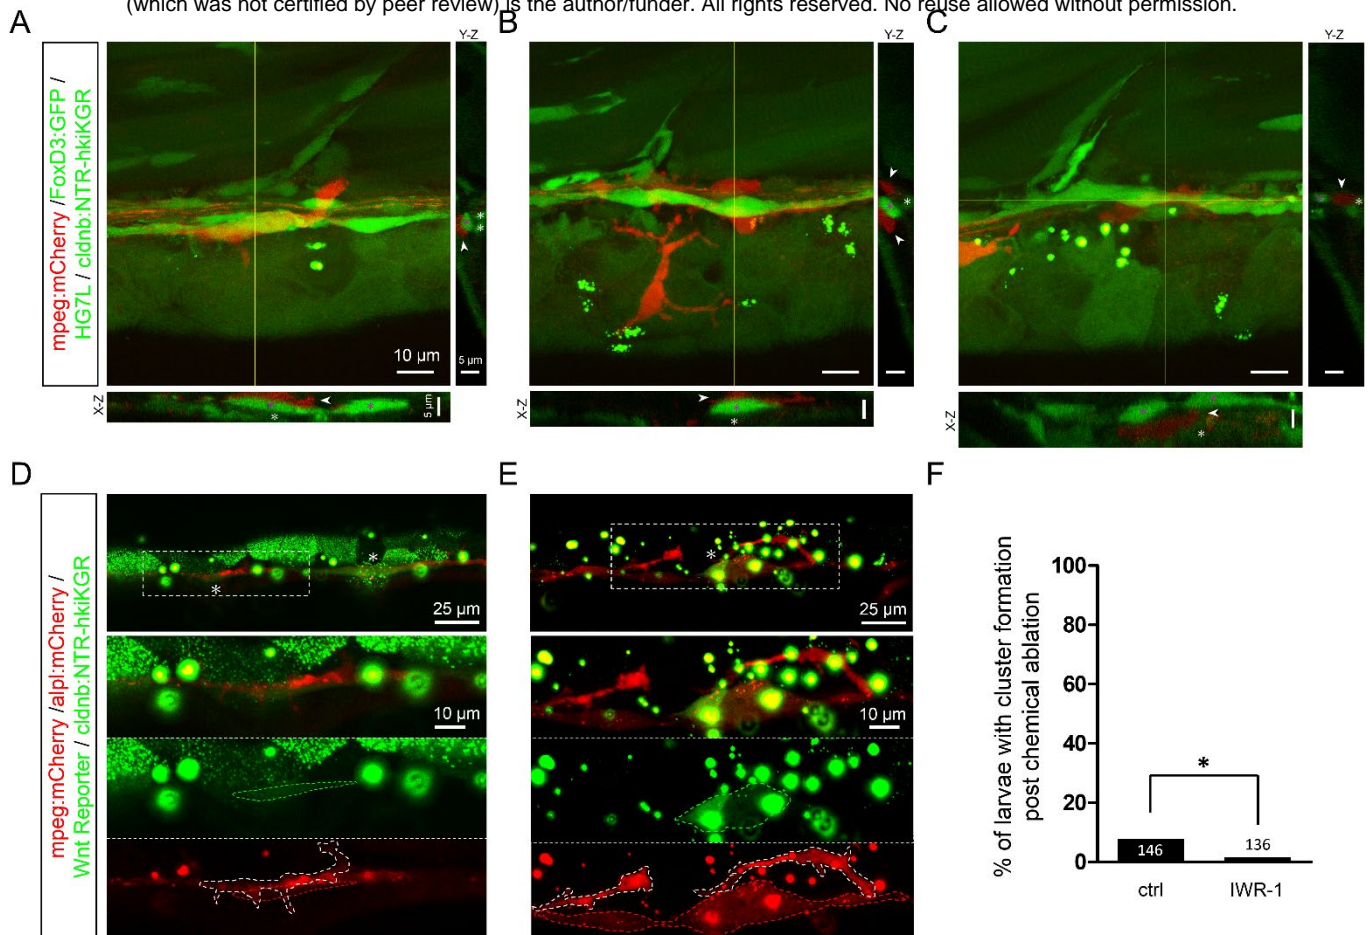

**Figure 8.** Infiltrated macrophages are found in between Schwann cells and interneuromast cells with higher *Wnt* activity in *Mtz*-treated larvae. (A-C) Images shown are representative confocal stacked images of *Mtz*-treated larvae from the cross of *Tg(mpeg1:mCherry; FoxD3:GFP)* and *Tg(-8.0cldnb:NTR-hKikGR; Et(HG7L))* in orthogonal views, while the X-Z and Y-Z views at the position of yellow lines are shown below and on the right side, respectively. Macrophages (red) indicated by arrowheads were mostly crawling on interneuromast cells (INCs, brighter green, marked by magenta asterisks) in (A-B). In some cases, macrophages were found in between INCs and Schwann cells (SWCs, dim green, labeled by white asterisks). Scale bars are the same but only provided in (A) for respective images. (D-E) Images presented are representative stacked confocal images of *Mtz*-treated larvae from the cross of *Tg(mpeg1:mCherry; -8.0cldnb:NTR-hKikGR)* and *Tg(-4.7alpl:mCherry; 6XTcf/LefBS-miniP:d2GFP)*. Areas shown higher *Wnt* activity are boxed with dash lines and indicated by asterisks. Magnified diagrams for the dashed rectangles are shown in different color channels to reveal INCs (red, top panel), *Wnt* signal (dim green, dashed region, middle panel) and macrophage (red, dashed region, bottom panel). Interestingly, some macrophages (enclosed with white dashed line) were found to interact with these activated INCs. Scale bar goes to 25  $\mu$ m or 10  $\mu$ m in magnified diagrams. (F) Larvae as above were treated without (ctrl) or with IWR-1 to disrupt *Wnt* activity and the percentages of larvae with cluster formation were counted as described previously. Data represents mean  $\pm$  s.e.m. and analyzed by one-way ANOVA, \* $P < 0.05$ .

## Figure 9

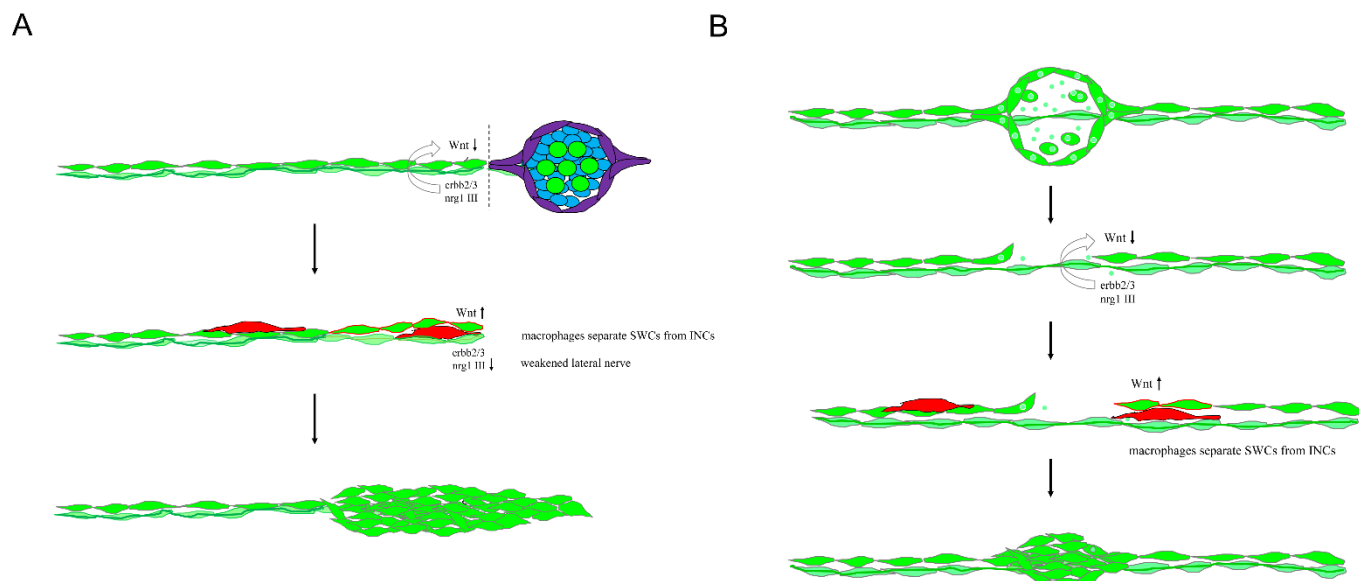

**Figure 9. Mechanistic models for lateral line regeneration.** (A) Under normal conditions, the pLLn (thick dark green thread) nrg1-III-activated *erb2/3* receptors within Schwann cells (SWCs, light green) keep interneuromast cells, (INCs, bright green) quiescent by limiting the Wnt activity. Upon the loss of distal neuromasts by tail amputation, the lateral line nerve is weakened (thin light green thread) in the proximity of cutting edge to break the quiescence of INCs (red outlines). The Wnt activity in INCs is elevated and results in the formation of cluster. (B) Upon specific ablation of neuromasts by NTR-hKikGR protein (bright green spots)-induced by Mtz without damaging surrounding posterior lateral line nerve and SWCs, INCs remain quiescent by integral EGF inhibition. Most macrophages crawl onto INCs which result in filling the gap without successful neuromast regeneration. However, occasionally macrophages could infiltrate in between INCs and SWCs. This breaks the contact between INCs and SWCs and the inhibition of EGF signaling. INCs are then activated to be able to differentiate and regenerate new neuromasts through cluster formation.

## SUPPLEMENTARY FIGURE & LEGENDS

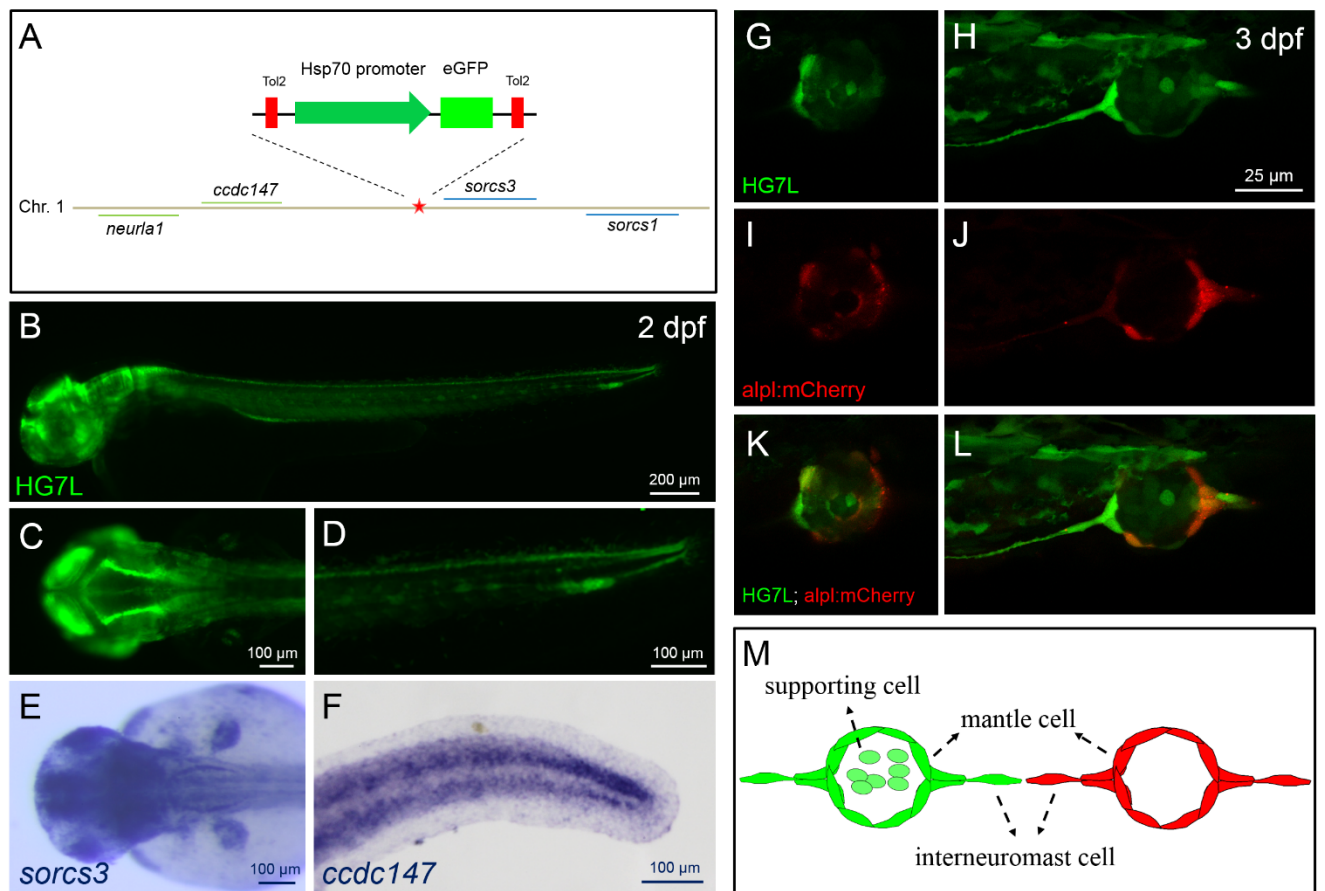

**Figure S1.** Generation and characterization of an enhancer-trapped line, *Et(HG7L)*, expressing EGFP in interneuromast and mantle cells. An enhancer trap line *Et(HG7L)* line was generated by random insertions of a Tol2 construct containing a heat-shock 70 (*hsp70*) promoter and an EGFP gene. The insertion site was between *ccdc147* and *sorcs3* in Chromosome 1 by inverse PCR analysis as shown in (A). A larva at 2 days post fertilization (dpf) was examined under epifluorescent microscopy, photographed with anterior to the left in the lateral side (B). Magnified dorsal and lateral view of anterior head and posterior region (D) are shown in (C) and (D), respectively. Larvae were fixed at 2 dpf and subjected whole-mount *in situ* hybridization against *sorcs3* (E, anterior head region in dorsal view) or *ccdc147* (F, posterior tail region in lateral view). (G-L) Larvae at 3-dpf from the cross of *Et(HG7L)* and *Tg(-4.7alpl:mCherry)* were immobilized and examined under confocal microscopy at EGFP (green) and mCherry (red) channel. At the EGFP channel, the *Et(HG7L)* revealed EGFP in interneuromast cells (INCs) and mantle cells (MCs) and also a subpopulation of supporting cells showing weaker expression (G,H). At the mCherry channel, the *Tg(-4.7alpl:mCherry)* had mCherry in INCs and MC, but not supporting cells (I,J). Green and red channel superimposed images are shown below (K,L). (M) A cartoon depicts the expressions of EGFP (green) and mCherry (red) in the *Et(HG7L)* (left) and *Tg(-4.7alpl:mCherry)* (right) lines, respectively.

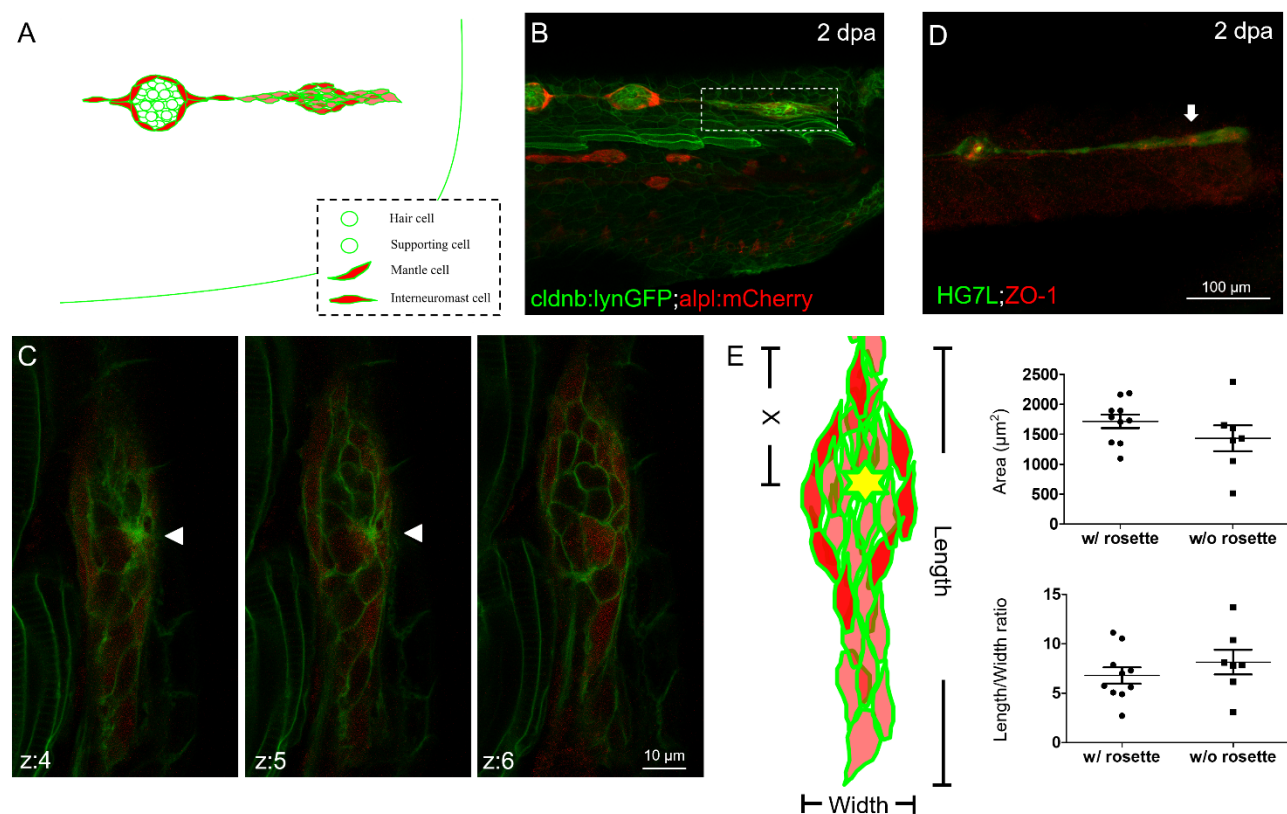

**Figure S2.** A rosette forms within the regenerating cluster as a landmark of neuromast formation. (A) We used larvae from the cross of *Tg(-8.0cldnb:lyn-GFP)* (*cldnb:lynGFP* in green) and *Tg(-4.7alpl:mCherry)* (*alpl:mCherry* in red) to reveal morphogenesis of neuromast regeneration post fin amputation. The *cldnb:lynGFP* line expressed green EGFP in all cell types of lateral line and the *alpl:mCherry* line expressed red mCherry in interneuromast cells and mantle cells as shown in the cartoon. (B) At 2 days post amputation (dpa), the double transgenic larvae had formed a cluster (boxed with a dash line) as examined under confocal microscopy. (C) The regenerating cluster was scanned at a higher magnification for 10 1.76-µm stacks labeled z1-10. Stack z4-6 are shown and a rosette (arrowhead) was clearly seen in the z-4 and z-5 stacks. (D) Larvae were also fixed and subjected to immunohistochemistry against ZO-1 expressed in tight junctions (red) and GFP expressed in lateral line (green). A strong ZO-1 signal was observed in the cluster (arrow) that is a sign of polarity establishment. (E) To compare clusters with and without a rosette, we measured the area, length and width of a cluster as shown in a cartoon on the left (a rosette is represented by a yellow asterisk) and calculated their area and length/width ratio. The “X” indicates the distance between the rosette center and the lagging end of cluster. Scatter plots are presented and each dot represents the measurement from one larva. Mean  $\pm$  s.e.m. are shown. Data were analyzed by one-way ANOVA ( $n = 18$ ).



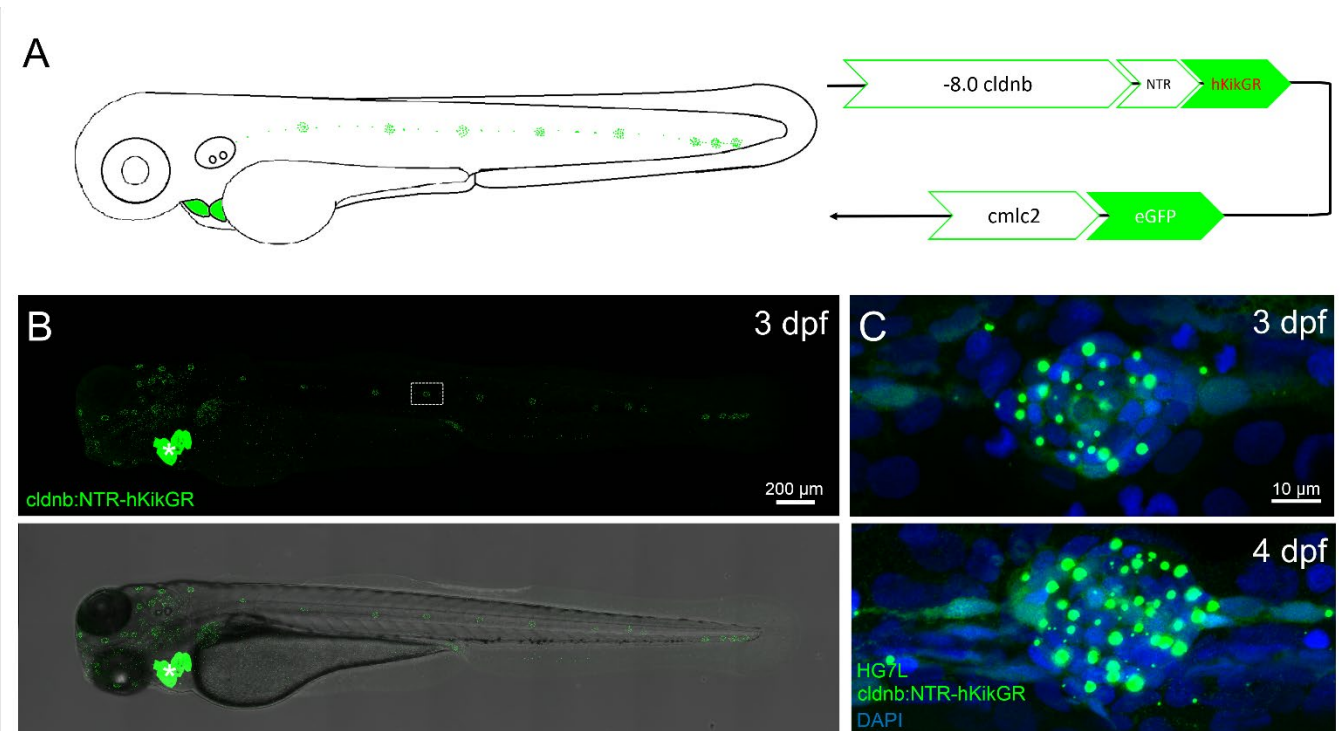

**Figure S3.** Characterization of a *Tg(-8.0cldnb:NTR-hKikGR; myl7:EGFP)* double-transgenic zebrafish line. (A) Design of a transgenic cassette composed of an 8-kb *claudin b* promoter (-8.0 *cldnb*), a nitroreductase gene (NTR) fused with a hKikGR gene, a *myl7* promoter and a EGFP gene. The transgenic cassette is expected to express green fluorescence along the lateral line and heart (missing) as depicted in a cartoon on the right. (B) The *Tg(-8.0cldnb:NTR-hKikGR; myl7:EGFP)* larvae at 3 days post fertilization (dpf) were fixed and examined under confocal microscopy at GFP channel. It showed a strong *myl7*-driven green fluorescence in the heart (white asterisk) that served as a convenient selection marker. Punctate green fluorescence was found in neuromasts as shown in a representative neuromast enclosed by a dashed rectangle along anterior (head region to the left) and posterior lateral line systems (trunk region to the right). A superimposed dark and bright field image is shown below. (C) Larvae from the cross of *Tg(-8.0cldnb:NTR-hKikGR; myl7:EGFP)* and *Et(HG7L)* were fixed, incubated with DAPI, examined and photographed at the GFP and UV channel. Representative superimposed images for a neuromast of 3 and 4-dpf larvae are presented. Punctate green fluorescence from NTR-hKikGR proteins was found around blue nuclei stained by DAPI in every cell within a neuromast.

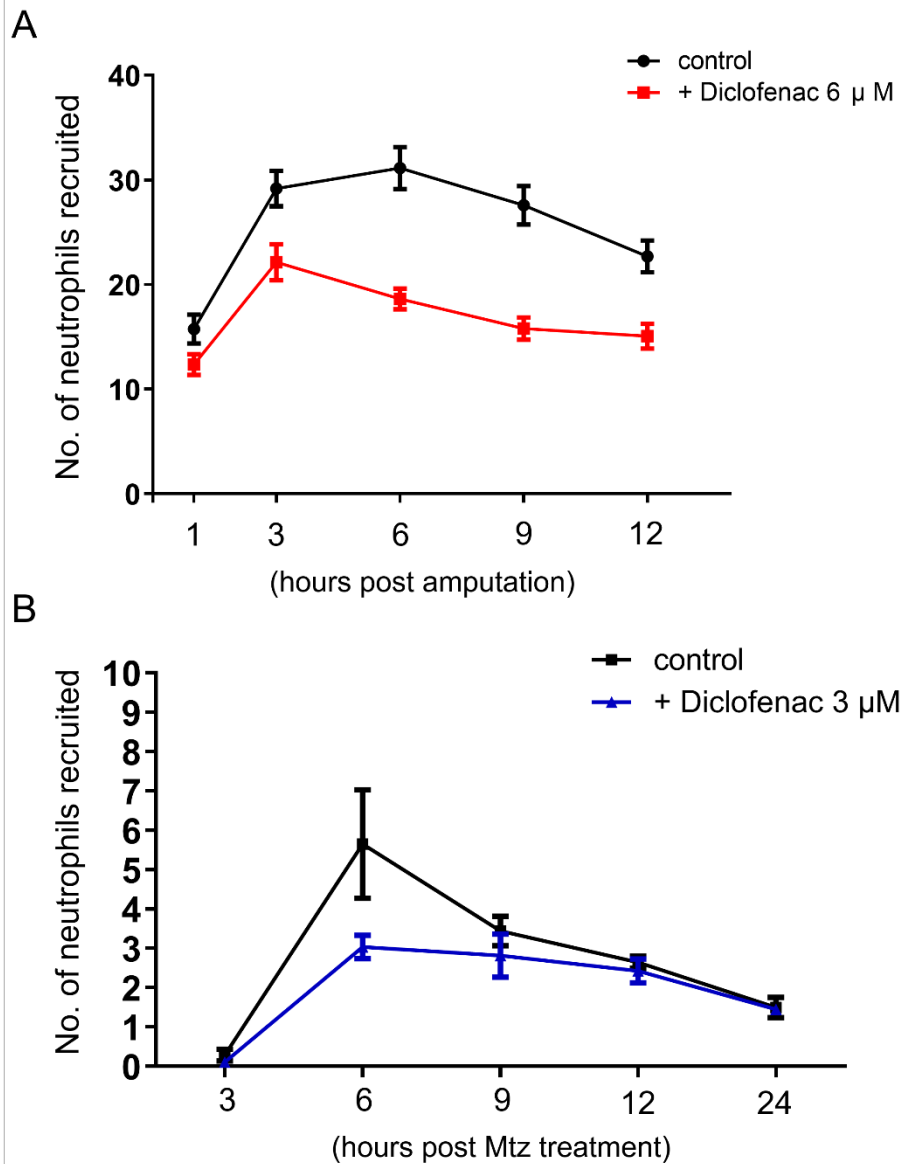

**Figure S4.** Neutrophils recruitment was impaired by diclofenac sodium post injury. (A) The 3-days post fertilization (dpf) larvae of *Tg(mpx:GFP; Et(HG7L))* with neutrophils labeled by GFP were tail-clipped to ablate neuromasts. After amputation, larvae were transferred to dish without or with Diclofenac and the number of neutrophils recruited to the proximal amputated tail were counted at designated stages (N = 3, n = 25 for the control group, n = 24 for the Diclofenac 3  $\mu$ M group, n = 27 for the Diclofenac 6  $\mu$ M group). (B) Mtz-treated *Tg(-8.0cldnb:NTR-hKikGR); Et(HG7L))* larvae were also transferred to dish without or with 3  $\mu$ M Diclofenac and the number of neutrophils recruited to the injury site were counted at designated stages (N = 3, n = 27 for the control group, n = 31 for the Diclofenac group).

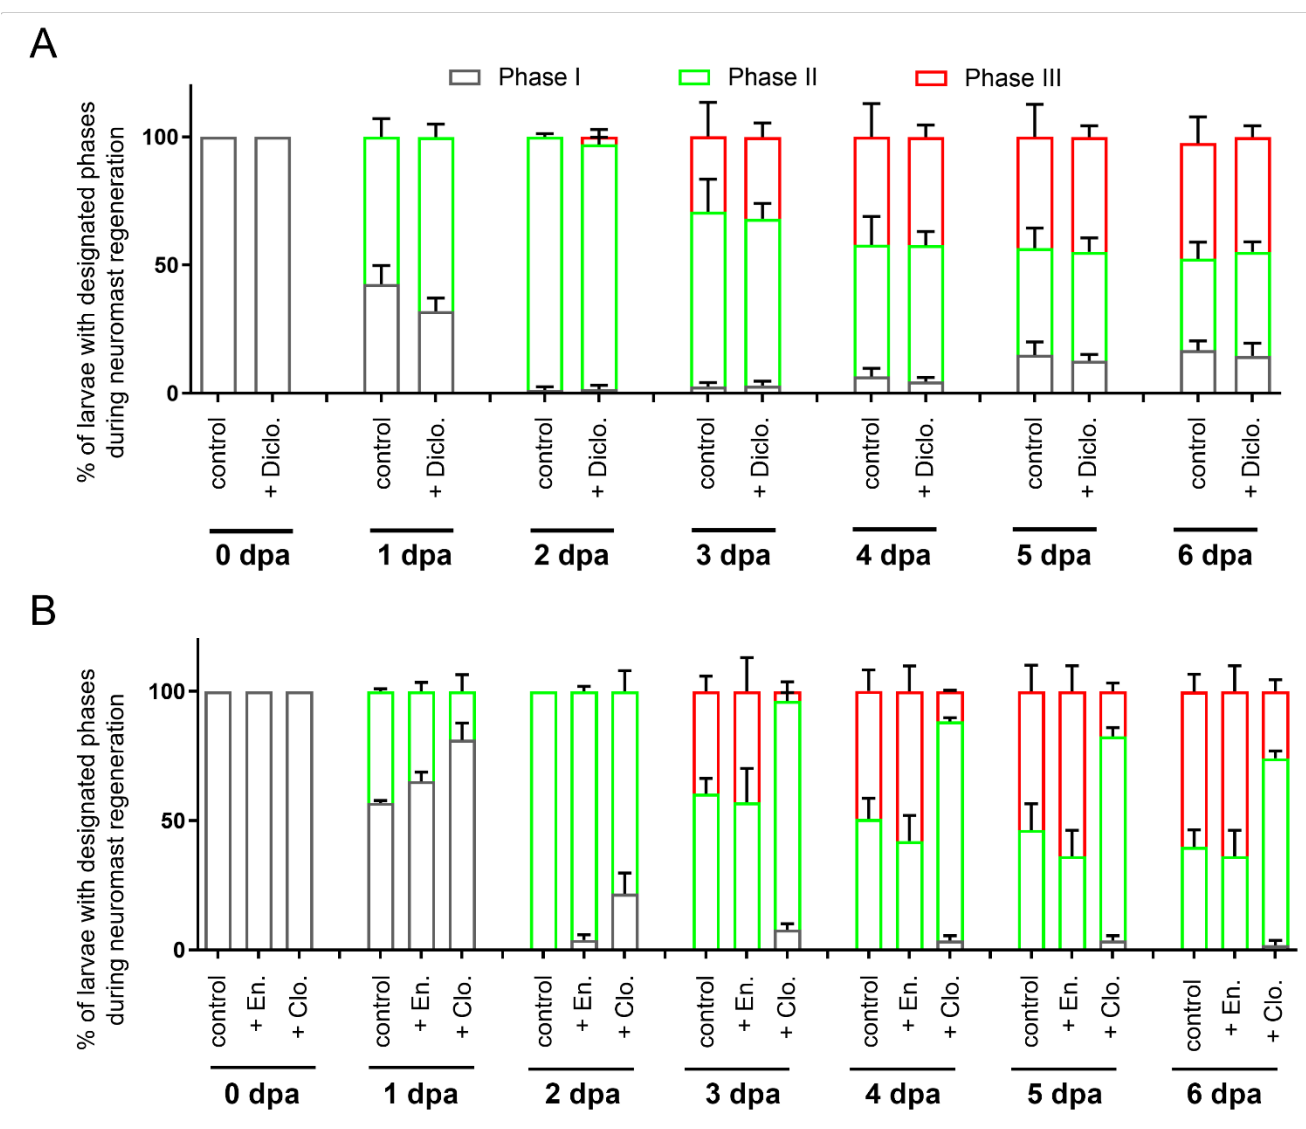

**Figure S5. Macrophage ablation retards the regeneration of neuromast post tail amputation.** (A) The vehicle control, encapsome (En), or clodronate liposomes (Clo) were injected into the posterior cardinal vein (PCV) of a *Et(HG7L)* larvae at 3 day post fertilization and the fin was amputated after injection. The numbers of survived larvae at each phase and treatment were counted at designated day post amputation (dpa) and the percentages of larvae are shown (N = 3). (B) *Et(HG7L)* larvae at 3 day post fertilization were fin amputated and cultured in designated concentration of diclofenac sodium. The number of survived larvae at each phase and treatment were counted at designated stages and the percentages of larvae are shown (N = 4).

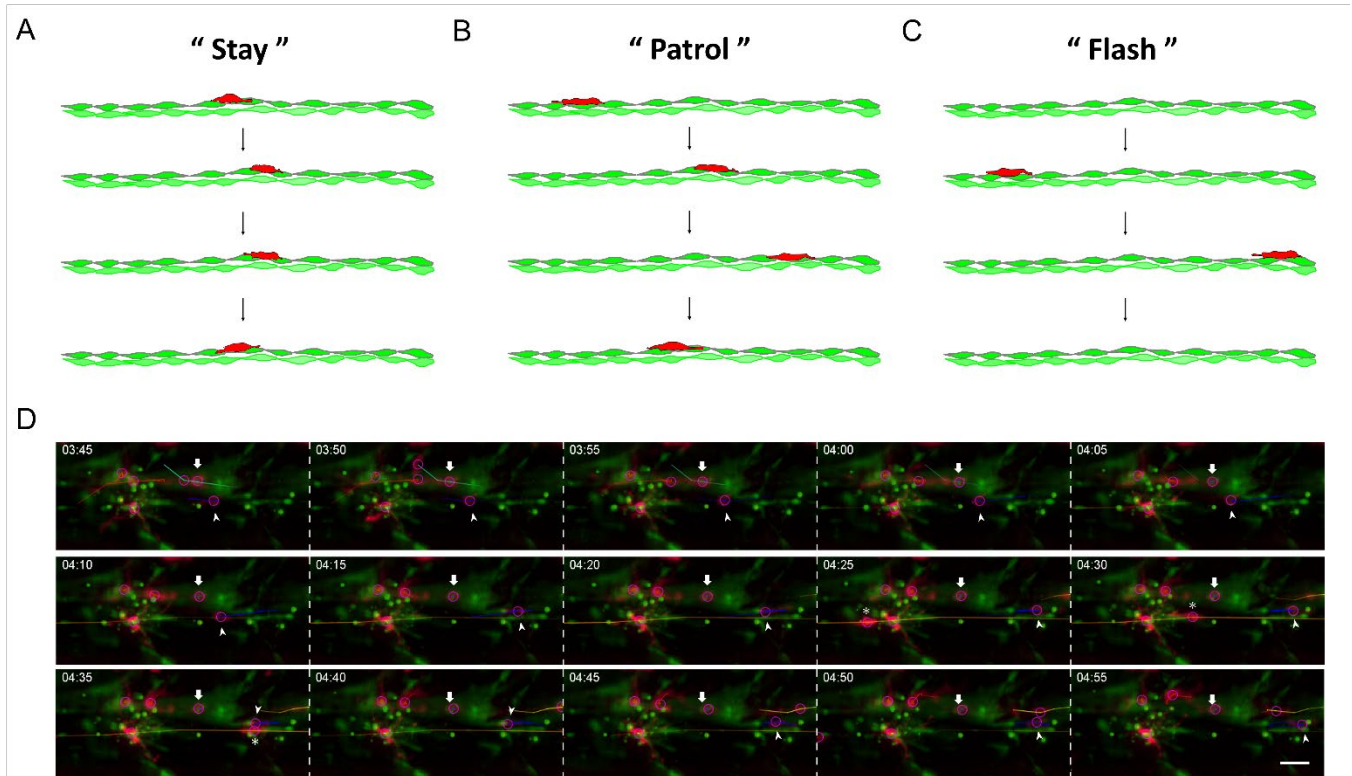

**Figure S6.** *Macrophages displays distinct cell behaviors, including “Stay”, “Patrol” and “Flash” during neuromast regeneration.* (A-C) Cartoons show macrophages (red) migrate along INCs (bright green with border line) and underneath SWCs (light green without border line) with differential directions and different velocity. We thus categorized these behaviors as (A) “Stay” with minimal movements, (B) “Patrol” with limited movements and frequent changes in direction, and (C) “Flash” with speedy unidirectional movement. (D) Snapshots of a 70-min movie was cropped from the Video 5. An arrow, arrow head or asterisk is indicating a “Stay”, “Patrol” or “Flash” macrophage, respectively, in each frame. Please note the migrating distance and direction of a macrophage along the X axis to appreciate the difference between different types of behavior.



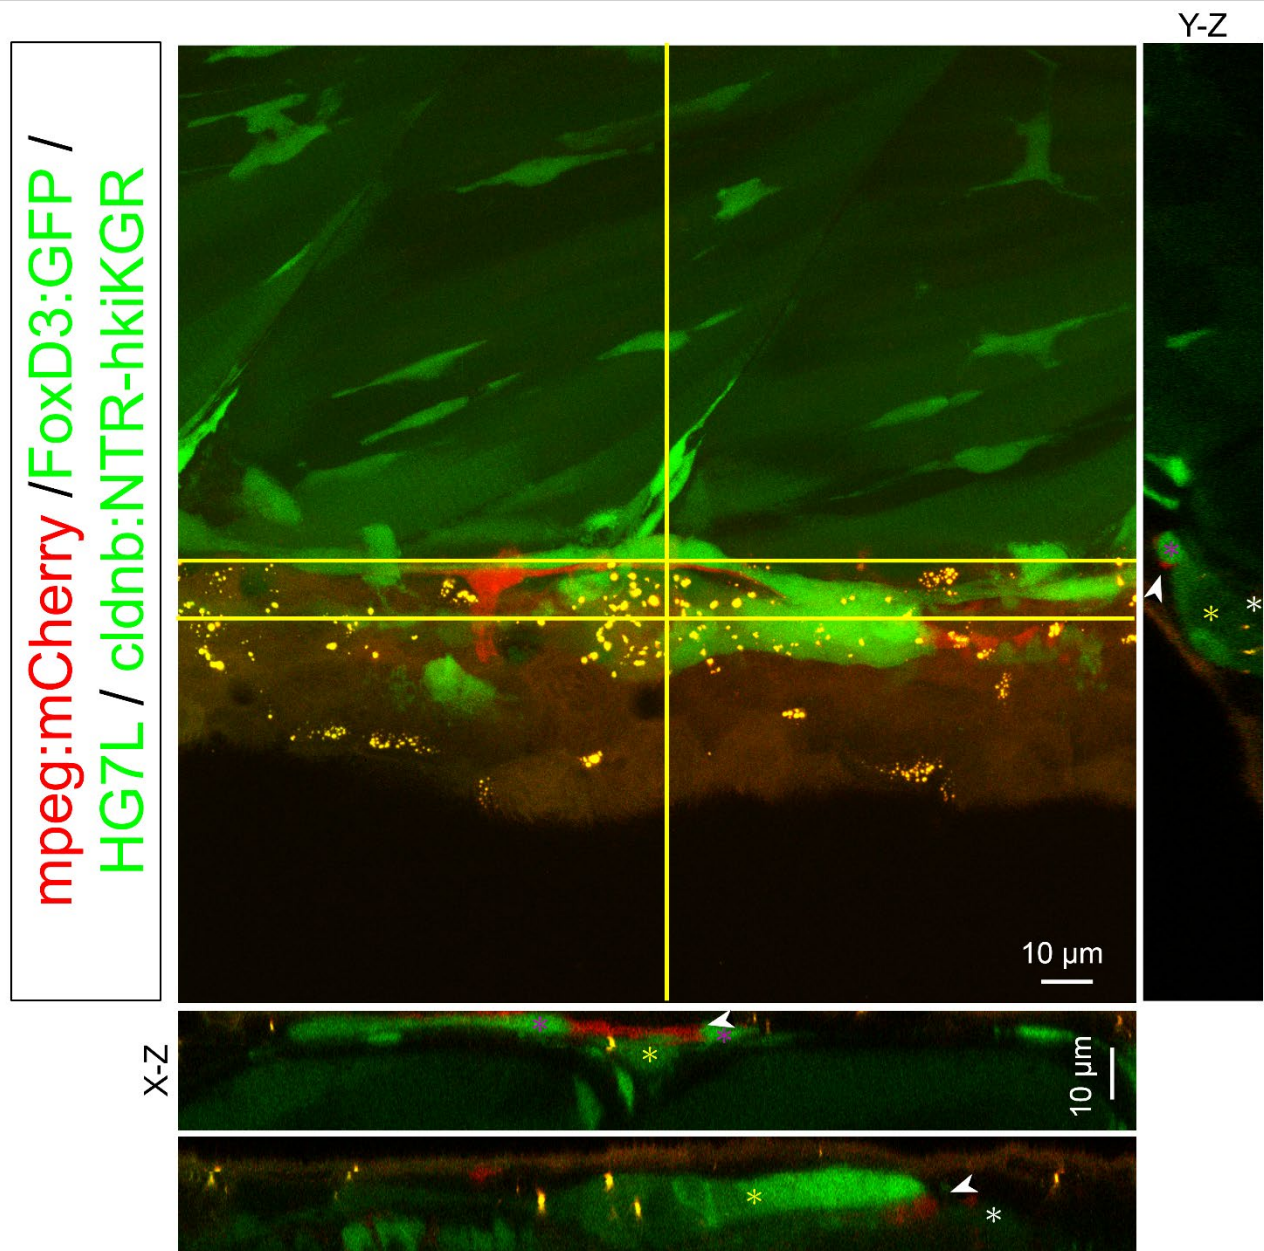

**Figure S7.** *Macrophages interact with 2<sup>nd</sup> posterior lateral line primordium (2<sup>nd</sup> pLLp) migration during development.* Images shown are representative confocal stacked images of 4-days post fertilization (hpf) larvae from the cross of *Tg(mpeg1:mCherry; FoxD3:GFP)* and *Tg(-8.0cldnb:NTR-hKikGR; Et(HG7L))* in orthogonal views, while two X-Z views and one Y-Z views are shown below and on the right side, respectively. Two separate X-Z views (upper or lower) were indicated by solid or dashed horizontal line. During development, 2<sup>nd</sup> pLLp (circles in dashed line) would migrate from the otic vesicle at later stages, along the same path of 1<sup>st</sup> pLLp. The 2<sup>nd</sup> pLLp would separate SWCs (white asterisks) and INCs, leading to the intercalary formation. Interestingly, macrophages (red) indicated by arrowheads were found in between the 2<sup>nd</sup> pLLp and INCs or SWCs. Scale bars are the same as 10  $\mu$ m.

## SUPPLEMENTARY MOVIE CAPTIONS

**Movie S1.** The tail fin of an *Et(HG7L)* larva at 3 days post fertilization (3 dpf) was cut to remove neuromast L6-8 as described in Fig. 1, embedded in agar and imaged under confocal microscopy. Images were taken at 6 min per frame for 6 h. This video shows the Phase I of neuromast regeneration described in Fig. 1. At the leading end toward cutting edge (bottom), most interneuromast cells (INCs) stayed in line with visible cell protrusions (arrowheads). Several INCs (arrows) were seen to crawl onto the original INC. Time is shown on the top right corner.

**Movie S2.** The *Et(HG7L)* larva was treated described in Video 1. This video shows the Phase II of neuromast regeneration. A large cluster was formed with many visible cell protrusions (arrowheads) at both leading and lagging end toward the cutting edge at the bottom.

**Movie S3.** The *Et(HG7L)* larva was treated described in Video 1. This video shows the Phase III of neuromast regeneration. A new neuromast was formed with a clear ring-like structure and GFP-labeled mantle cells.

**Movie S4.** AG1478 caused hyperactive cell protrusion and cell division. Cell protrusions are marked by arrowheads. Mother cell and two daughter cells are labeled by white and magenta asterisks, respectively.

**Movie S5.** *In toto* imaging analysis shows differential macrophage (red) behaviors during regeneration. Larvae from the cross of *Tg(mpeg1:mCherry; FoxD3:GFP)* and *Tg(-8.0cldnb:NTR-hKikGR); Et(HG7L)* were treated with Mtz and monitored under a light-sheet fluorescent microscope. Time-lapse movies of merged green and red channels (top row), merged channels with cell tracking (purple circles, middle row), and red channel with cell tracking (bottom row) are combined vertically and presented. Images were taken at 5 min per frame for 6 h 35 min as shown on the top left.

**Movie S6.** Uneven distribution of recruited macrophages (red) during regeneration were analyzed and presented as graphic interchange format of bar chart (upper row) to reveal the dynamics of macrophage distribution. Larvae from the cross of *Tg(mpeg1:mCherry; FoxD3:GFP)* and *Tg(-8.0cldnb:NTR-hKikGR); Et(HG7L)* were treated with Mtz and observed under a light-sheet fluorescence microscope. Time-lapse movies of merged channels with cell tracking (middle row), and red channel with cell tracking (bottom row) are combined vertically and shown here. Images were

taken at 5 min per frame for 11 h 55 min as shown on the top left of images.

**Movie S7.** This video is a three-dimensional pseudo color reconstruction. While most macrophages (red, left) were crawling on INCs (left), some macrophages (red, middle) could scroll through the space between INCs and underneath SWCs (right).

**Movie S8.** Macrophages (red) could push away interneuromast cells (green, indicated by an arrow) while passing by.

**Movie S9.** Macrophages (red) were not only in contact with interneuromasts (green, arrow) but were also dynamically embracing the second posterior lateral line primordium (green, open arrow) during development.
